# Supplementary material for: Multi-omics analysis reveals the physiological and molecular response to cold stress in different spring wheat cultivars at the booting stage
Source: Front Plant Sci. 2025 Aug 4;16:1594676. doi: 10.3389/fpls.2025.1594676 (PMC12358470; doi:10.3389/fpls.2025.1594676)
Supplement: Supplementary file 8 [file Table7.xlsx]

## Sheet: Supplementary Table 7
Supplementary Table 7 The analysis of KEGG pathways of differentially expressed genes in two comparison groups.
Comparison	Pathway	ko_ID	Selected_gene_in_Pathway	Gene_id	KEGG_Orthology
CM104CK_vs_CM104CT	Glycosaminoglycan degradation	ko00531	15	TraesCS2A03G0391700;TraesCS2A03G0727700;TraesCS2D03G0416500;TraesCS2D03G0670600;TraesCS3A03G1041900;TraesCS3B03G0619400LC;TraesCS3B03G1202600;TraesCS3D03G0496500;TraesCS3D03G0969300;TraesCS4A03G0040800;TraesCS4D03G0663100;TraesCS5A03G0187900;TraesCS5B03G0199600;TraesCS7A03G0635900;TraesCS7B03G0725500	K12309+K10532+K12309+K10532+K10532+K12309+K10532+K12309+K10532+K12309+K12309+K07964+K07964+K12309+K12309
	Betalain biosynthesis	ko00965	11	TraesCS4A03G0602900;TraesCS4A03G1070400;TraesCS4B03G0907800;TraesCS4D03G0167900;TraesCS5B03G0633700;TraesCS5D03G0583200;TraesCS6A03G0729300;TraesCS6B03G0043100;TraesCS6B03G0864300;TraesCS6D03G0612100;TraesCS7D03G0120600	K15777+K01593+K01593+K15777+K15777+K15777+K15777+K15777+K15777+K15777+K01593
	Fatty acid metabolism	ko01212	16	TraesCS1D03G0178000;TraesCS2B03G0205900;TraesCS3A03G0164700;TraesCS3A03G0859400;TraesCS3B03G0984000;TraesCS3B03G1117200;TraesCS3D03G0788100;TraesCS5A03G0599200;TraesCS5D03G0353700;TraesCS5D03G0360300;TraesCS6B03G0061000LC;TraesCS6B03G1132900LC;TraesCS7A03G0222800;TraesCS7A03G0456900;TraesCS7B03G0116500;TraesCS7D03G0321800	K01897+K03921+K10258+K03921+K03921+K03921+K03921+K03921+K01897+K01897+K11262+K10258+K10251+K03921+K00232+K00232
	Carbon metabolism	ko01200	77	TraesCS1A03G0847500;TraesCS1A03G0869800;TraesCS1B03G0202500;TraesCS1B03G0388600;TraesCS1B03G0974500;TraesCS1D03G0137400;TraesCS1D03G0610200;TraesCS1D03G0815700;TraesCS2A03G0013700;TraesCS2A03G0131600;TraesCS2A03G0397000;TraesCS2A03G0703000;TraesCS2A03G0727500;TraesCS2B03G0179200;TraesCS2B03G0179300;TraesCS2B03G0457300;TraesCS2B03G0522600;TraesCS2B03G0782200;TraesCS2B03G0904800;TraesCS2B03G0995100…	K00850+K00844+K00927+K00844+K00850+K00927+K01006+K00850+K00844+K01602+K00131+K01689+K01895+K01602+K01602+K00121+K00131+K01689+K00850+K01803+K01602+K01807+K01689+K01637+K00850+K01595+K00029+K00844+K01079+K00850+K01595+K00074+K00844+K00627+K01595+K00640+K00844+K01913+K01610+K00121+K00121+K03781+K01913+K01689+K00814+K00162+K11517+K00814+K00850+K11517+K11517+K15634+K00036+K02437+K15893+K15634+K00036+…
	Cutin, suberine and wax biosynthesis	ko00073	14	TraesCS1A03G0405200;TraesCS1B03G0495700;TraesCS1D03G0374000;TraesCS2B03G1082700;TraesCS2B03G1433900;TraesCS3B03G0227800;TraesCS4D03G0823600;TraesCS5A03G0565600;TraesCS5A03G1198400;TraesCS5D03G0740800;TraesCS6B03G0926000;TraesCS6B03G1188000;TraesCS6D03G0660400;TraesCS7D03G1228500	K15404+K15404+K15404+K15398+K21995+K20495+K13356+K15404+K15402+K15406+K17991+K15404+K17991+K15402
	MAPK signaling pathway - plant	ko04016	112	TraesCS1A03G0514200;TraesCS1A03G0685600;TraesCS1A03G0875600;TraesCS1A03G1005000;TraesCS1B03G0603200;TraesCS1B03G0660400;TraesCS1B03G0779800;TraesCS1B03G1022100;TraesCS1B03G1186600;TraesCS1D03G0365600LC;TraesCS1D03G0523300;TraesCS1D03G0649500;TraesCS1D03G0851600;TraesCS1D03G0930000LC;TraesCS1D03G0975200;TraesCS2A03G0000300;TraesCS2A03G0000700;TraesCS2A03G0066500;TraesCS2A03G0205300;TraesCS2A03G103…	K14496+K14498+K14497+K14497+K14496+K14498+K14498+K14497+K14497+K13447+K20547+K14498+K14497+K14509+K20538+K14509+K14497+K20547+K14514+K13425+K14498+K14510+K14514+K13416+K13425+K14498+K14497+K20547+K14514+K17686+K13416+K13425+K14498+K20718+K14498+K14497+K14497+K14497+K13422+K13425+K16224+K16224+K14497+K14509+K13424+K14497+K14497+K14497+K14497+K13416+K14509+K13424+K14497+K14497+K14497+K13422+K14497+…
	Folate biosynthesis	ko00790	9	TraesCS1B03G0562200;TraesCS1D03G0804900;TraesCS2B03G0955700;TraesCS5A03G0152300;TraesCS5A03G1274300;TraesCS5B03G0918300;TraesCS5D03G0186400;TraesCS6B03G0652700;TraesCS7A03G1006400	K01930+K01307+K00079+K03639+K01724+K15631+K15631+K14652+K14652
	2-Oxocarboxylic acid metabolism	ko01210	6	TraesCS4B03G0643100;TraesCS4B03G0938300;TraesCS4D03G0823500;TraesCS5A03G0151800;TraesCS5A03G1239900;TraesCS5B03G0163300	K00826+K00826+K00826+K00814+K00826+K00814
	Galactose metabolism	ko00052	48	TraesCS1A03G0847500;TraesCS1A03G0869800;TraesCS1B03G0388600;TraesCS1B03G0974500;TraesCS1D03G0815700;TraesCS2A03G0013700;TraesCS2A03G0199600;TraesCS2A03G0391700;TraesCS2A03G1298700;TraesCS2B03G0270400;TraesCS2B03G0812900;TraesCS2B03G0887900;TraesCS2B03G0904800;TraesCS2B03G0972400;TraesCS2B03G1488800;TraesCS2D03G0198000LC;TraesCS2D03G0201500;TraesCS2D03G0416500;TraesCS2D03G0651800LC;TraesCS2D03G074…	K00850+K00844+K00844+K00850+K00850+K00844+K18819+K12309+K01193+K18819+K01193+K01785+K00850+K01193+K01193+K12447+K18819+K12309+K12447+K01785+K01193+K00850+K06617+K00844+K00850+K12309+K00844+K12309+K00844+K12309+K07407+K18819+K07407+K18819+K12309+K00850+K07407+K01193+K07407+K07407+K01193+K06617+K06617+K12309+K06617+K12309+K06617+K06617
	Various types of N-glycan biosynthesis	ko00513	5	TraesCS3A03G0138900LC;TraesCS3B03G1286400LC;TraesCS3D03G0100700;TraesCS7B03G0399300;Triticum_aestivum_newGene_2564	K14413+K01230+K14412+K03714+K01230
	Sesquiterpenoid and triterpenoid biosynthesis	ko00909	11	TraesCS2B03G0019900;TraesCS2D03G0016100;TraesCS2D03G0016300;TraesCS4A03G0000900;TraesCS4A03G0650000LC;TraesCS5A03G0912900;TraesCS5B03G1322800;TraesCS5D03G0874100;TraesCS7A03G0541100;TraesCS7B03G0356700;TraesCS7B03G1082100LC	K15803+K15803+K15803+K19011+K00511+K15472+K19010+K15472+K19011+K19011+K15803
	Arginine biosynthesis	ko00220	7	TraesCS4B03G0101500;TraesCS4D03G0084000;TraesCS5A03G0151800;TraesCS5B03G0163300;TraesCS6A03G0987300;TraesCS6B03G1210400;TraesCS6D03G0872600	K01915+K01915+K00814+K00814+K00611+K00611+K00611
	Benzoxazinoid biosynthesis	ko00402	10	TraesCS2B03G0142700;TraesCS2D03G0053100;TraesCS4A03G0773600;TraesCS5A03G1039500;TraesCS5B03G1092300;TraesCS5B03G1181700;TraesCS7D03G0187500;TraesCS7D03G0261400;TraesCSU03G0020900;Triticum_aestivum_newGene_13310	K13229+K13229+K13229+K13222+K13222+K13223+K13229+K13227+K13229+K13229
	Sphingolipid metabolism	ko00600	18	TraesCS1D03G0492500;TraesCS2A03G0391700;TraesCS2D03G0416500;TraesCS3B03G0505300LC;TraesCS3B03G0619400LC;TraesCS3D03G0496500;TraesCS4A03G0040800;TraesCS4B03G0155200;TraesCS4D03G0130900;TraesCS4D03G0663100;TraesCS5B03G1137700;TraesCS6A03G0096000;TraesCS6A03G0796300;TraesCS6B03G0943700;TraesCS7A03G0635900;TraesCS7B03G0627300;TraesCS7B03G0725500;TraesCS7D03G0753800	K17108+K12309+K12309+K12349+K12309+K12309+K12309+K07407+K07407+K12309+K23451+K07407+K07407+K07407+K12309+K17108+K12309+K17108
	Indole alkaloid biosynthesis	ko00901	1	TraesCS5B03G0519900	K01757
	Arachidonic acid metabolism	ko00590	4	TraesCS2B03G0955700;TraesCS4B03G0597200;TraesCS5B03G1230500;TraesCS6A03G0669900	K00079+K01047+K08726+K00432
	Limonene and pinene degradation	ko00903	4	TraesCS6A03G0655400;TraesCS6B03G0824200;TraesCS6D03G0543500;TraesCS6D03G0651800	K00128+K00128+K00128+K00128
	Oxidative phosphorylation	ko00190	10	TraesCS2A03G0732600;TraesCS2A03G1328200;TraesCS2D03G1296400;TraesCS3A03G0338800;TraesCS3B03G0415400;TraesCS3D03G0330000;TraesCS6B03G0862000;TraesCS7A03G0989900;TraesCS7B03G0830600;TraesCS7D03G1182800	K03884+K01507+K01507+K02150+K02150+K02150+K01507+K02150+K02265+K01535
	Nucleotide excision repair	ko03420	43	TraesCS1A03G0206300;TraesCS1A03G0209900;TraesCS1A03G0840800;TraesCS1B03G0274800;TraesCS1B03G0280500;TraesCS1B03G0452400;TraesCS1D03G0199500;TraesCS1D03G0203400;TraesCS1D03G0809400;TraesCS2A03G0889000;TraesCS2B03G0979500;TraesCS2B03G1156600;TraesCS2D03G0514300;TraesCS2D03G0831300;TraesCS2D03G0974700;TraesCS3A03G0258700;TraesCS3A03G0310800;TraesCS3A03G0336800;TraesCS3A03G0408000;TraesCS3B03G0495200…	K07466+K06634+K03505+K07466+K06634+K02324+K07466+K06634+K03505+K04802+K04802+K10839+K03657+K04802+K10839+K02325+K03504+K07466+K10740+K10740+K02325+K10740+K07466+K07466+K10756+K07466+K07466+K02326+K07466+K02328+K04802+K10739+K04802+K10739+K04802+K10739+K10739+K10839+K10842+K10839+K07466+K07466+K10839
	Caffeine metabolism	ko00232	2	TraesCS3A03G0888400;TraesCS3B03G1014900	K00365+K00365
	SNARE interactions in vesicular transport	ko04130	8	TraesCS3A03G1198600;TraesCS4A03G0652100;TraesCS4B03G0147400;TraesCS4D03G0124600;TraesCS4D03G0217500;TraesCS6A03G0202500;TraesCS6B03G0270500;TraesCS6D03G0063300	K08500+K08486+K08486+K08486+K08500+K08495+K08495+K08507
	beta-Alanine metabolism	ko00410	17	TraesCS2A03G1264000;TraesCS2B03G0210000;TraesCS2B03G1445600;TraesCS2D03G0146700;TraesCS2D03G1218200;TraesCS3A03G0046100;TraesCS3A03G0644200;TraesCS3D03G1158300;TraesCS4B03G0113000;TraesCS4B03G0619700;TraesCS6A03G0655400;TraesCS6B03G0824200;TraesCS6D03G0543500;TraesCS6D03G0651800;TraesCS7B03G0116500;TraesCS7D03G0321800;TraesCS7D03G0884200	K17839+K00276+K17839+K00276+K17839+K01580+K12259+K01580+K01580+K00276+K00128+K00128+K00128+K00128+K00232+K00232+K13366
	Lysine biosynthesis	ko00300	3	TraesCS3B03G0956400LC;TraesCS5B03G0391600;TraesCS5D03G0372600	K10206+K00003+K00003
	Photosynthesis	ko00195	7	TraesCS2A03G0608700;TraesCS2B03G0550300;TraesCS2B03G0698400;TraesCS3A03G0900500;TraesCS3B03G0980700;TraesCS3D03G0784700;TraesCS4A03G0878700	K02641+K08906+K02641+K03542+K08903+K08903+K08903
	Stilbenoid, diarylheptanoid and gingerol biosynthesis	ko00945	7	TraesCS5A03G0571200;TraesCS5B03G0583200;TraesCS5D03G0537400;TraesCS6A03G0980600;TraesCS6D03G0039000;TraesCS6D03G0050900;TraesCS7D03G0105600	K13065+K13065+K13065+K16040+K16040+K13065+K17212
	Peroxisome	ko04146	27	TraesCS1A03G0241000;TraesCS1B03G0350800LC;TraesCS1D03G0178000;TraesCS3A03G0655700;TraesCS3B03G0743500;TraesCS3B03G0922500;TraesCS3D03G0594600;TraesCS4B03G0844400;TraesCS4D03G0823600;TraesCS5A03G0677100;TraesCS5A03G0873200;TraesCS5A03G1006000;TraesCS5B03G0914900;TraesCS5B03G1230500;TraesCS5D03G0353700;TraesCS5D03G0360300;TraesCS5D03G0628800;TraesCS5D03G0648100;TraesCS5D03G0835300;TraesCS5D03G09526…	K13348+K17879+K01897+K05677+K05677+K01640+K05677+K03781+K13356+K00306+K04564+K11517+K04564+K08726+K01897+K01897+K11517+K00306+K04564+K11517+K03781+K00232+K00830+K00232+K00830+K00830+K04564
	Cyanoamino acid metabolism	ko00460	26	TraesCS2A03G0074000;TraesCS2A03G1187800;TraesCS2A03G1188200;TraesCS2B03G1350800;TraesCS2B03G1501600;TraesCS2D03G1140700;TraesCS3B03G0476500;TraesCS5A03G0658400;TraesCS5A03G0931100;TraesCS5B03G0693900;TraesCS5B03G0757800;TraesCS5B03G0758600;TraesCS5B03G0981400;TraesCS5B03G0981700;TraesCS5D03G0627300;TraesCS5D03G0687600;TraesCS5D03G0687700;TraesCS5D03G0687800;TraesCS5D03G0889900;TraesCS5D03G0890100…	K05350+K13051+K13051+K13051+K01188+K13051+K01188+K01188+K05349+K01188+K01188+K01188+K01188+K01188+K01188+K01188+K01188+K01188+K01188+K01188+K01188+K01188+K01188+K08248+K01188+K01188
	Phosphonate and phosphinate metabolism	ko00440	3	TraesCS5A03G0400200;TraesCS5B03G0398100;TraesCS6A03G0160900	K00967+K00967+K00993
	Glycolysis / Gluconeogenesis	ko00010	64	TraesCS1A03G0712400;TraesCS1A03G0847500;TraesCS1A03G0869800;TraesCS1B03G0202500;TraesCS1B03G0388600;TraesCS1B03G0813000;TraesCS1B03G0974500;TraesCS1B03G1183200;TraesCS1D03G0137400;TraesCS1D03G0610200;TraesCS1D03G0675900;TraesCS1D03G0815700;TraesCS2A03G0013700;TraesCS2A03G0397000;TraesCS2A03G0703000;TraesCS2A03G0727500;TraesCS2A03G1039100;TraesCS2B03G0457300;TraesCS2B03G0522600;TraesCS2B03G0782200…	K00002+K00850+K00844+K00927+K00844+K00002+K00850+K01792+K00927+K01006+K00002+K00850+K00844+K00131+K01689+K01895+K01792+K00121+K00131+K01689+K01785+K00850+K01803+K01689+K01785+K00850+K00844+K01568+K00850+K00844+K00627+K01568+K00002+K00844+K01913+K18857+K18857+K01610+K00121+K00121+K18857+K01913+K01689+K00162+K00850+K18857+K15634+K00128+K15634+K00128+K00128+K00128+K00161+K01689+K00161+K01623+K01689+…
	Phenylalanine metabolism	ko00360	22	TraesCS1B03G1202000;TraesCS1D03G0980000;TraesCS2A03G0644800;TraesCS2A03G0922600;TraesCS2A03G0922900;TraesCS2B03G0210000;TraesCS2B03G0725600;TraesCS2D03G0052100;TraesCS2D03G0146700;TraesCS2D03G0603700;TraesCS2D03G0863200;TraesCS2D03G0863300;TraesCS3A03G0779600;TraesCS3B03G0905300;TraesCS4A03G0174000;TraesCS4A03G0736900LC;TraesCS4A03G1070400;TraesCS4B03G0619700;TraesCS4B03G0907800;TraesCS6B03G07592…	K01426+K01426+K01426+K10775+K10775+K00276+K01426+K01426+K00276+K01426+K10775+K10775+K01426+K00074+K01426+K01426+K01593+K00276+K01593+K10775+K10775+K01593
	Circadian rhythm - plant	ko04712	84	TraesCS1A03G0201700;TraesCS1A03G1003500LC;TraesCS1B03G0270100;TraesCS1B03G1183900LC;TraesCS1D03G0192500;TraesCS2A03G0207000;TraesCS2A03G1078800;TraesCS2A03G1223400;TraesCS2B03G0222600;TraesCS2B03G0222800;TraesCS2B03G0284400;TraesCS2B03G1209500;TraesCS2B03G1400600;TraesCS2D03G0053600;TraesCS2D03G0211700;TraesCS2D03G0729000;TraesCS2D03G0805200;TraesCS2D03G1021500;TraesCS2D03G1182700;TraesCS3A03G033…	K12126+K16240+K12126+K16240+K12126+K16222+K12133+K00660+K12129+K12129+K16222+K12133+K00660+K00660+K16222+K12118+K12135+K12133+K00660+K16223+K16223+K16240+K16223+K16240+K16222+K16221+K12120+K16221+K12135+K12120+K16221+K12130+K12135+K16222+K12120+K16221+K12130+K12129+K16222+K16221+K12126+K12130+K16221+K12126+K12130+K00660+K16221+K12135+K12130+K16221+K16241+K03097+K12133+K12133+K12126+K12119+K12133+…
	Pyruvate metabolism	ko00620	23	TraesCS1D03G0610200;TraesCS2A03G0727500;TraesCS3A03G0316700;TraesCS3A03G0696300;TraesCS3B03G0401400;TraesCS3B03G1403100LC;TraesCS3D03G0317900;TraesCS4A03G0245000;TraesCS4B03G0604400;TraesCS4D03G0462300;TraesCS5A03G0899800;TraesCS5A03G1073800;TraesCS5B03G1138700;TraesCS5D03G1028500;TraesCS6A03G0655400;TraesCS6B03G0061000LC;TraesCS6B03G0824200;TraesCS6D03G0543500;TraesCS6D03G0651800;TraesCS7A03G046…	K01006+K01895+K01595+K00029+K01595+K00627+K01595+K01913+K01610+K01913+K00162+K01759+K01759+K01759+K00128+K11262+K00128+K00128+K00128+K00161+K00161+K00161+K01595
	Pantothenate and CoA biosynthesis	ko00770	16	TraesCS2A03G1264000;TraesCS2B03G1445600;TraesCS2D03G1218200;TraesCS3B03G0409400;TraesCS4B03G0643100;TraesCS4B03G0938300;TraesCS4D03G0250400;TraesCS4D03G0823500;TraesCS5A03G1239900;TraesCS6A03G0224800;TraesCS6A03G0655400;TraesCS6B03G0824200;TraesCS6D03G0543500;TraesCS6D03G0651800;TraesCSU03G0084800LC;TraesCSU03G0085300LC	K17839+K17839+K17839+K01513+K00826+K00826+K06133+K00826+K00826+K02201+K00128+K00128+K00128+K00128+K02201+K02201
	Protein export	ko03060	8	TraesCS1B03G0764100;TraesCS1D03G0600900;TraesCS1D03G0636100;TraesCS4A03G0241300;TraesCS4B03G0527200;TraesCS4D03G0466100;TraesCS5A03G1075500;TraesCS6A03G0233900	K03070+K10956+K03070+K10956+K10956+K10956+K13280+K13431
	Linoleic acid metabolism	ko00591	2	TraesCS4B03G0597200;TraesCS4D03G0058900	K01047+K15718
	Ribosome biogenesis in eukaryotes	ko03008	20	TraesCS2A03G0833900;TraesCS2A03G1014500;TraesCS2B03G0923600;TraesCS2D03G0777500;TraesCS2D03G1202300;TraesCS3A03G0110600LC;TraesCS3B03G0713100;TraesCS4A03G0677800;TraesCS5A03G0073400;TraesCS5A03G0628200;TraesCS5B03G0056600;TraesCS5B03G0383900;TraesCS5B03G0646900;TraesCS5D03G0596500;TraesCS6A03G0338100;TraesCS6A03G0441500;TraesCS6B03G0437000;TraesCS6D03G0685500;TraesCS7A03G1161600;TraesCS7D03G08032…	K14555+K14574+K14555+K14555+K14544+K14536+K14548+K11883+K14539+K14544+K14536+K14559+K14544+K14544+K07178+K03097+K07178+K14566+K14563+K14544
	Fatty acid degradation	ko00071	17	TraesCS1D03G0178000;TraesCS2B03G0457300;TraesCS3B03G0227800;TraesCS4A03G0540100;TraesCS4B03G0241100;TraesCS4B03G0798300;TraesCS4B03G0798400;TraesCS4D03G0203800;TraesCS5D03G0353700;TraesCS5D03G0360300;TraesCS5D03G0964200LC;TraesCS6A03G0655400;TraesCS6B03G0824200;TraesCS6D03G0543500;TraesCS6D03G0651800;TraesCS7B03G0116500;TraesCS7D03G0321800	K01897+K00121+K20495+K18857+K18857+K00121+K00121+K18857+K01897+K01897+K18857+K00128+K00128+K00128+K00128+K00232+K00232
	Ubiquitin mediated proteolysis	ko04120	54	TraesCS1A03G0100900;TraesCS1A03G0718900;TraesCS1A03G0946200;TraesCS1B03G0124900;TraesCS1B03G0460100;TraesCS1B03G0575800;TraesCS1B03G0819700;TraesCS1D03G0359800;TraesCS1D03G0681600;TraesCS1D03G0719600;TraesCS1D03G0745800;TraesCS2A03G1077900;TraesCS2B03G0841900;TraesCS2B03G1001700LC;TraesCS2B03G1207400;TraesCS2D03G0703800;TraesCS2D03G1020100;TraesCS3A03G0056900;TraesCS3A03G0058800;TraesCS3A03G04462…	K04506+K10575+K10581+K04506+K10576+K03363+K10575+K10144+K10575+K06689+K08770+K10260+K10615+K09561+K10260+K10615+K10260+K04506+K04506+K06688+K10615+K10615+K04506+K04506+K04506+K04506+K06688+K10615+K10615+K03875+K03364+K03875+K03364+K02927+K10144+K03354+K10581+K10144+K02927+K10260+K10615+K03363+K10580+K03094+K08770+K10615+K03363+K03363+K03363+K04506+K03354+K04506+K04506+K04506
	Fatty acid biosynthesis	ko00061	11	TraesCS1D03G0178000;TraesCS2B03G0205900;TraesCS3A03G0859400;TraesCS3B03G0984000;TraesCS3B03G1117200;TraesCS3D03G0788100;TraesCS5A03G0599200;TraesCS5D03G0353700;TraesCS5D03G0360300;TraesCS6B03G0061000LC;TraesCS7A03G0456900	K01897+K03921+K03921+K03921+K03921+K03921+K03921+K01897+K01897+K11262+K03921
	Tryptophan metabolism	ko00380	28	TraesCS1B03G1202000;TraesCS1D03G0581100;TraesCS1D03G0980000;TraesCS2A03G0644800;TraesCS2B03G0725600;TraesCS2D03G0052100;TraesCS2D03G0603700;TraesCS3A03G0213000;TraesCS3A03G0779600;TraesCS3B03G0255800;TraesCS3D03G0193300;TraesCS4A03G0174000;TraesCS4A03G0736900LC;TraesCS4A03G0759500LC;TraesCS4A03G1070400;TraesCS4B03G0844400;TraesCS4B03G0907800;TraesCS4B03G0980700;TraesCS4D03G0373900;TraesCS5A03G056…	K01426+K16903+K01426+K01426+K01426+K01426+K01426+K11816+K01426+K11816+K11816+K01426+K01426+K11816+K01593+K03781+K01593+K22588+K11816+K11816+K11817+K11816+K00128+K00128+K03781+K00128+K00128+K01593
	Glycosylphosphatidylinositol (GPI)-anchor biosynthesis	ko00563	1	TraesCS1D03G0648300	K03860
	Biosynthesis of amino acids	ko01230	67	TraesCS1A03G0504600;TraesCS1A03G0847500;TraesCS1B03G0202500;TraesCS1B03G0812300;TraesCS1B03G0974500;TraesCS1B03G1214800;TraesCS1D03G0137400;TraesCS1D03G0675000;TraesCS1D03G0815700;TraesCS2A03G0340100;TraesCS2A03G0628200LC;TraesCS2A03G0703000;TraesCS2B03G0456400;TraesCS2B03G0782200;TraesCS2B03G0904800;TraesCS2B03G0995100;TraesCS2B03G1106400;TraesCS2D03G0628500;TraesCS2D03G0651000;TraesCS2D03G09321…	K05359+K00850+K00927+K12657+K00850+K01953+K00927+K12657+K00850+K01626+K06001+K01689+K01626+K01689+K00850+K01803+K01620+K01807+K01689+K01620+K00850+K12657+K01079+K00850+K10206+K12657+K00640+K12657+K05359+K00641+K01915+K00826+K00826+K01915+K01953+K05359+K01689+K00826+K00814+K14152+K00826+K00814+K00003+K14152+K00850+K00003+K01953+K14152+K14152+K15634+K00611+K00872+K15634+K00611+K00789+K00611+K01689+…
	Ribosome	ko03010	19	TraesCS1B03G0904500;TraesCS2B03G0811300;TraesCS3A03G0209900;TraesCS3A03G0396300;TraesCS3A03G0450100;TraesCS3A03G0715000;TraesCS3B03G0253200;TraesCS3D03G0189100;TraesCS3D03G0417300;TraesCS4A03G0162700;TraesCS4A03G0176700;TraesCS4A03G0846700;TraesCS4B03G0599200;TraesCS4D03G0191800;TraesCS4D03G0544300;TraesCS5D03G1161300;TraesCS7A03G0074300LC;TraesCS7B03G0597500LC;TraesCS7D03G1139100	K02996+K02952+K02894+K02899+K02908+K02974+K02894+K02894+K02908+K02904+K02927+K02945+K02927+K02884+K02904+K02945+K02995+K02995+K02990
	Glycosphingolipid biosynthesis - globo and isoglobo series	ko00603	4	TraesCS4B03G0155200;TraesCS4D03G0130900;TraesCS6A03G0096000;TraesCS6A03G0796300	K07407+K07407+K07407+K07407
	Phenylalanine, tyrosine and tryptophan biosynthesis	ko00400	8	TraesCS1A03G0504600;TraesCS2A03G0340100;TraesCS2A03G0628200LC;TraesCS2B03G0456400;TraesCS4A03G0218800;TraesCS4D03G0487700;TraesCS7B03G0794000;TraesCS7D03G0914900	K05359+K01626+K06001+K01626+K05359+K05359+K06001+K06001
	Proteasome	ko03050	3	TraesCS1A03G0674100;TraesCS3B03G1000800LC;TraesCS6B03G1110500	K03029+K02737+K03030
	Fatty acid elongation	ko00062	20	TraesCS1B03G0499200;TraesCS1B03G1176600;TraesCS1D03G0959800;TraesCS3A03G0164700;TraesCS4D03G0312200;TraesCS5A03G0752900;TraesCS5B03G0978900;TraesCS5D03G0714300;TraesCS5D03G0887200;TraesCS6A03G0774100;TraesCS6B03G0921700;TraesCS6B03G1132900LC;TraesCS6D03G0148200;TraesCS7A03G0222800;TraesCS7A03G0481300;TraesCS7B03G0296600;TraesCS7B03G0296900;TraesCS7B03G0703100;TraesCS7D03G0465800;TraesCS7D03G07504…	K15397+K15397+K15397+K10258+K15397+K15397+K15397+K15397+K15397+K15397+K15397+K10258+K15397+K10251+K15397+K15397+K15397+K15397+K15397+K15397
	Monoterpenoid biosynthesis	ko00902	3	TraesCS1B03G1178900;TraesCS1D03G0961800;TraesCS4A03G0773500	K15095+K15095+K23810
	Sulfur relay system	ko04122	2	TraesCS5A03G0152300;TraesCS6D03G0285100	K03639+K01011
	Glycerolipid metabolism	ko00561	49	TraesCS1A03G0610900;TraesCS1A03G0712400;TraesCS1B03G0419300;TraesCS1B03G0702400;TraesCS1B03G0813000;TraesCS1D03G0578600;TraesCS1D03G0675900;TraesCS2A03G0956100;TraesCS3A03G0194100;TraesCS3A03G0775100;TraesCS3A03G0832100;TraesCS3B03G0953000;TraesCS3D03G0173000;TraesCS3D03G0300000;TraesCS3D03G0716500;TraesCS3D03G0748200;TraesCS3D03G0763300;TraesCS3D03G0792900;TraesCS4A03G0192600;TraesCS4A03G0684900…	K00901+K00002+K13508+K00901+K00002+K00901+K00002+K00679+K00679+K00901+K00679+K00679+K00679+K01054+K00901+K13508+K00679+K00002+K09480+K01054+K01054+K00679+K00679+K01054+K07407+K00679+K01054+K07407+K03715+K00679+K09480+K13508+K07407+K00128+K00679+K07407+K00679+K00128+K07407+K00128+K00128+K00679+K22848+K11155+K22848+K11155+K00679+K22848+K00002
	Vitamin B6 metabolism	ko00750	1	TraesCS4B03G0932200	K00275
	Mannose type O-glycan biosynthesis	ko00515	2	TraesCS3A03G0046600;TraesCS3D03G0040400	K18207+K18207
	N-Glycan biosynthesis	ko00510	5	TraesCS3B03G1286400LC;TraesCS4D03G0810400;TraesCS5A03G1227500;TraesCS5D03G0139300;Triticum_aestivum_newGene_2564	K01230+K00729+K00729+K00737+K01230
	RNA polymerase	ko03020	6	TraesCS3A03G0249700;TraesCS3D03G0243500;TraesCS6A03G0759900;TraesCS7B03G0364200;TraesCS7B03G0517500LC;TraesCS7D03G0525400	K03004+K03004+K03012+K03022+K03006+K03022
	Tropane, piperidine and pyridine alkaloid biosynthesis	ko00960	6	TraesCS2B03G0210000;TraesCS2D03G0146700;TraesCS4A03G0193900;TraesCS4B03G0619700;TraesCS4D03G0515400;TraesCS5B03G0066900	K00276+K00276+K08081+K00276+K08081+K08081
	Other glycan degradation	ko00511	22	TraesCS1A03G0256500;TraesCS1D03G0257100;TraesCS1D03G0492500;TraesCS2A03G0391700;TraesCS2A03G0783200;TraesCS2D03G0416500;TraesCS3B03G0619400LC;TraesCS3D03G0496500;TraesCS4A03G0040800;TraesCS4B03G0681900;TraesCS4D03G0663100;TraesCS5A03G0703200;TraesCS5D03G0826700;TraesCS6D03G0018800;TraesCS7A03G0268700;TraesCS7A03G0635900;TraesCS7B03G0032300;TraesCS7B03G0627300;TraesCS7B03G0725500;TraesCS7D03G02458…	K01206+K01206+K17108+K12309+K01191+K12309+K12309+K12309+K12309+K15923+K12309+K01206+K01206+K01206+K01206+K12309+K01206+K17108+K12309+K01206+K17108+K01206
	Glycine, serine and threonine metabolism	ko00260	27	TraesCS2A03G0628200LC;TraesCS2A03G0959600;TraesCS2B03G0210000;TraesCS2B03G1062000;TraesCS2B03G1094200;TraesCS2B03G1106400;TraesCS2D03G0146700;TraesCS2D03G0932100;TraesCS3A03G1239300LC;TraesCS4B03G0469500;TraesCS4B03G0619700;TraesCS5A03G0677100;TraesCS5B03G0391600;TraesCS5D03G0372600;TraesCS5D03G0648100;TraesCS6A03G0267300;TraesCS6A03G0397300;TraesCS6A03G1045900;TraesCS6B03G0000500;TraesCS6B03G035…	K06001+K00108+K00276+K00108+K12235+K01620+K00276+K01620+K01079+K00827+K00276+K00306+K00003+K00003+K00306+K15634+K02437+K00872+K15893+K15634+K00130+K00830+K06001+K00830+K00830+K06001+K00058
	Basal transcription factors	ko03022	12	TraesCS1A03G0209900;TraesCS1A03G0374000;TraesCS1B03G0280500;TraesCS1D03G0203400;TraesCS1D03G0782400;TraesCS3A03G1240200;TraesCS4A03G0752500;TraesCS4B03G0609300;TraesCS4D03G0022700;TraesCS4D03G0540300;TraesCS5B03G0817900;TraesCS7B03G0087900	K06634+K03120+K06634+K06634+K03139+K03123+K03120+K03138+K03120+K03138+K03124+K10842
	Lipoic acid metabolism	ko00785	2	TraesCS3B03G0860700;TraesCS4A03G0271100	K03644+K23735
	Flavonoid biosynthesis	ko00941	31	TraesCS1B03G0730700;TraesCS2A03G1126200;TraesCS2A03G1139300;TraesCS2A03G1223400;TraesCS2B03G0120700;TraesCS2B03G1400600;TraesCS2D03G0053600;TraesCS2D03G0079000;TraesCS2D03G1078400;TraesCS2D03G1182700;TraesCS3B03G0803700;TraesCS3D03G0647000;TraesCS4A03G0798300;TraesCS5A03G0407600;TraesCS5A03G0571200;TraesCS5A03G1120900;TraesCS5B03G0403600;TraesCS5B03G0583200;TraesCS5B03G1189000;TraesCS5D03G0007700…	K22845+K08695+K22845+K00660+K23180+K00660+K00660+K23180+K08695+K00660+K22845+K22845+K05278+K01859+K13065+K01859+K01859+K13065+K01859+K00660+K01859+K13065+K22845+K01859+K13065+K13083+K05280+K05280+K01859+K05280+K01859
	Isoquinoline alkaloid biosynthesis	ko00950	7	TraesCS2B03G0210000;TraesCS2D03G0146700;TraesCS4A03G1070400;TraesCS4B03G0619700;TraesCS4B03G0907800;TraesCS5D03G0543300;TraesCS7D03G0120600	K00276+K00276+K01593+K00276+K01593+K14975+K01593
	Pentose and glucuronate interconversions	ko00040	42	TraesCS1A03G0308800;TraesCS1A03G0712400;TraesCS1A03G0888000;TraesCS1B03G0813000;TraesCS1B03G1039100;TraesCS1B03G1039900;TraesCS1B03G1202100;TraesCS1D03G0675900;TraesCS1D03G0812500;TraesCS1D03G0864500;TraesCS2A03G0225400;TraesCS2B03G0312700;TraesCS2B03G0737200;TraesCS2D03G0198000LC;TraesCS2D03G0610900;TraesCS2D03G0651800LC;TraesCS3A03G0592000;TraesCS3D03G0043100LC;TraesCS3D03G0792900;TraesCS3D03G0…	K01184+K00002+K01213+K00002+K01213+K01213+K01184+K00002+K01051+K01213+K01051+K01051+K01728+K12447+K01728+K12447+K01184+K01728+K00002+K16190+K01184+K01184+K01728+K01728+K01051+K01728+K16190+K01213+K01728+K01184+K01728+K01051+K01051+K00008+K01213+K01213+K01728+K00002+K00008+K01213+K01728+K01213
	Valine, leucine and isoleucine biosynthesis	ko00290	4	TraesCS4B03G0643100;TraesCS4B03G0938300;TraesCS4D03G0823500;TraesCS5A03G1239900	K00826+K00826+K00826+K00826
	Glyoxylate and dicarboxylate metabolism	ko00630	24	TraesCS2A03G0131600;TraesCS2A03G0727500;TraesCS2B03G0179200;TraesCS2B03G0179300;TraesCS2B03G1515500;TraesCS2D03G0128700;TraesCS2D03G0820100;TraesCS2D03G1278500;TraesCS4A03G0245000;TraesCS4B03G0101500;TraesCS4B03G0844400;TraesCS4D03G0084000;TraesCS4D03G0462300;TraesCS5A03G1006000;TraesCS5D03G0628800;TraesCS5D03G0952600;TraesCS6A03G0397300;TraesCS6B03G0000500;TraesCS6D03G0101500;TraesCS7A03G0499300…	K01602+K01895+K01602+K01602+K22133+K01602+K01637+K22133+K01913+K01915+K03781+K01915+K01913+K11517+K11517+K11517+K02437+K15893+K03781+K22133+K00830+K22133+K00830+K00830
	Citrate cycle (TCA cycle)	ko00020	8	TraesCS3B03G1403100LC;TraesCS4B03G0338500;TraesCS4B03G0604400;TraesCS4D03G0288500;TraesCS5A03G0899800;TraesCS7A03G0464700;TraesCS7B03G0271100;TraesCS7D03G0446000	K00627+K01648+K01610+K01648+K00162+K00161+K00161+K00161
	Propanoate metabolism	ko00640	4	TraesCS2A03G0727500;TraesCS6B03G0061000LC;TraesCS7B03G0116500;TraesCS7D03G0321800	K01895+K11262+K00232+K00232
	Histidine metabolism	ko00340	8	TraesCS5A03G0798600;TraesCS5B03G0831300;TraesCS5D03G0755300;TraesCS5D03G0824800;TraesCS6A03G0655400;TraesCS6B03G0824200;TraesCS6D03G0543500;TraesCS6D03G0651800	K14152+K14152+K14152+K14152+K00128+K00128+K00128+K00128
	Phagosome	ko04145	14	TraesCS1A03G0663000;TraesCS1D03G0600900;TraesCS1D03G0735500;TraesCS3A03G0338800;TraesCS3B03G0415400;TraesCS3D03G0330000;TraesCS4A03G0241300;TraesCS4B03G0527200;TraesCS4B03G0946500;TraesCS4D03G0105300;TraesCS4D03G0466100;TraesCS5A03G1247300;TraesCS7A03G0989900;Triticum_aestivum_newGene_22366	K07375+K10956+K07375+K02150+K02150+K02150+K10956+K10956+K07375+K07374+K10956+K07375+K02150+K07375
	Glutathione metabolism	ko00480	42	TraesCS1A03G0175800;TraesCS1A03G0249100;TraesCS1A03G0502000;TraesCS1A03G0662600;TraesCS1B03G0632800;TraesCS1B03G0661800;TraesCS1D03G0170700;TraesCS1D03G0221200;TraesCS1D03G0486800;TraesCS1D03G0487600;TraesCS2A03G0760500;TraesCS2D03G0723000;TraesCS3A03G0294000;TraesCS3D03G0280000;TraesCS4A03G0213000;TraesCS4B03G0558200;TraesCS4B03G0857000;TraesCS4B03G0857100;TraesCS4B03G0857200;TraesCS4D03G0333000…	K01919+K00799+K00799+K00799+K00799+K01255+K01919+K00799+K00799+K00799+K00434+K22596+K00799+K00799+K00799+K00799+K00799+K00799+K00799+K22596+K00799+K00799+K00799+K00799+K22596+K00036+K00432+K10807+K22596+K01255+K00036+K22596+K00434+K10807+K10808+K10807+K10808+K00799+K10807+K10808+K01256+K00036
	Phenylpropanoid biosynthesis	ko00940	94	TraesCS1A03G0480800;TraesCS1A03G0528300;TraesCS1A03G0535100;TraesCS1A03G0789400;TraesCS1A03G0791400;TraesCS1A03G1061000;TraesCS1B03G0591000;TraesCS1B03G0617700;TraesCS1B03G0625200;TraesCS1B03G0907900;TraesCS1D03G0454400;TraesCS1D03G0516200;TraesCS1D03G0755500;TraesCS1D03G0756600;TraesCS2A03G0074000;TraesCS2A03G0676300;TraesCS2A03G0815300;TraesCS2A03G0922600;TraesCS2A03G0922900;TraesCS2A03G1334700…	K09755+K01904+K00430+K00430+K23260+K09753+K09755+K01904+K00430+K00430+K09755+K00430+K00430+K00430+K05350+K01904+K00430+K10775+K10775+K00430+K00083+K00430+K00430+K00430+K01188+K00083+K00430+K00430+K10775+K10775+K00430+K00430+K00430+K00430+K09753+K01188+K00430+K01904+K00430+K09753+K13065+K00430+K01188+K09753+K00430+K05349+K00430+K00083+K13065+K01188+K09753+K09753+K01188+K01188+K01188+K01188+K23260+…
	Endocytosis	ko04144	52	TraesCS1A03G0032500;TraesCS1A03G0517100;TraesCS1A03G0694200;TraesCS1B03G0791600;TraesCS1B03G1039700;TraesCS1D03G0023900;TraesCS1D03G0660300;TraesCS2A03G1360500;TraesCS2B03G1562400;TraesCS2D03G1331600;TraesCS3A03G0288100;TraesCS3A03G0715100;TraesCS3A03G0853300;TraesCS3A03G0865600;TraesCS3B03G0355200;TraesCS3B03G0697200;TraesCS3B03G0820500;TraesCS3B03G0988800;TraesCS3D03G0566400;TraesCS3D03G0658000…	K00889+K12493+K03283+K03283+K01115+K00889+K03283+K01115+K01115+K01115+K01115+K19366+K12471+K07904+K01115+K11866+K19366+K07904+K11866+K19366+K19366+K03283+K00889+K03283+K03283+K03283+K19366+K01115+K03283+K19366+K12189+K03283+K12189+K03283+K12189+K03283+K12483+K03283+K03283+K12483+K03283+K03283+K12486+K12483+K12486+K03283+K07904+K03283+K07904+K07937+K07904+K05757
	Arginine and proline metabolism	ko00330	41	TraesCS1A03G0552200;TraesCS1B03G0644100;TraesCS1B03G0812300;TraesCS1B03G1202000;TraesCS1D03G0532400;TraesCS1D03G0675000;TraesCS1D03G0980000;TraesCS2A03G0644800;TraesCS2A03G0813400;TraesCS2A03G1264000;TraesCS2B03G0725600;TraesCS2B03G0899700;TraesCS2B03G1445600;TraesCS2D03G0052100;TraesCS2D03G0603700;TraesCS2D03G0755300;TraesCS2D03G1218200;TraesCS3A03G0644200;TraesCS3A03G0779600;TraesCS3A03G0864700…	K00318+K00318+K12657+K01426+K00318+K12657+K01426+K01426+K10536+K17839+K01426+K10536+K17839+K01426+K01426+K10536+K17839+K12259+K01426+K12657+K12657+K12657+K01583+K00472+K01426+K01426+K01583+K01611+K01583+K01583+K01611+K01611+K00128+K01611+K01611+K00128+K01611+K01611+K00128+K00128+K13366
	Glycosphingolipid biosynthesis - ganglio series	ko00604	8	TraesCS2A03G0391700;TraesCS2D03G0416500;TraesCS3B03G0619400LC;TraesCS3D03G0496500;TraesCS4A03G0040800;TraesCS4D03G0663100;TraesCS7A03G0635900;TraesCS7B03G0725500	K12309+K12309+K12309+K12309+K12309+K12309+K12309+K12309
	Photosynthesis - antenna proteins	ko00196	15	TraesCS1A03G0986900;TraesCS1A03G0988100;TraesCS1B03G1169100;TraesCS1B03G1170500;TraesCS5A03G0783800;TraesCS5B03G0815100;TraesCS5D03G0741600;TraesCS6A03G0215300;TraesCS6A03G0217000;TraesCS6A03G0828700;TraesCS6B03G0305800;TraesCS6B03G0306000;TraesCS6D03G0175200;TraesCS7B03G0466400LC;TraesCS7D03G0623200	K08912+K08912+K08912+K08912+K08913+K08913+K08913+K08912+K08912+K08911+K08912+K08912+K08912+K08912+K08912
	RNA transport	ko03013	30	TraesCS1A03G0127900;TraesCS1A03G0200700;TraesCS1A03G0986400;TraesCS1B03G0175300;TraesCS1B03G0269500;TraesCS1B03G1168700;TraesCS1D03G0119300;TraesCS1D03G0679000;TraesCS1D03G0953700;TraesCS2A03G0512500LC;TraesCS2B03G0474400;TraesCS2D03G0475700;TraesCS3A03G0350000;TraesCS3A03G0785200;TraesCS3A03G1035300;TraesCS3B03G0425600;TraesCS3B03G0904100;TraesCS3D03G0340500;TraesCS3D03G0725400;TraesCS3D03G09384…	K14292+K03260+K03251+K14292+K03260+K03251+K14292+K14292+K03251+K14300+K03248+K03113+K03231+K03113+K14308+K03231+K03113+K03231+K03113+K14289+K03260+K03260+K14300+K03260+K03260+K14292+K03260+K03252+K14292+K03260
	Butanoate metabolism	ko00650	11	TraesCS2A03G1007000;TraesCS3A03G0046100;TraesCS3B03G0905300;TraesCS3B03G0922500;TraesCS3D03G1158300;TraesCS4A03G0245000;TraesCS4B03G0113000;TraesCS4D03G0462300;TraesCS6A03G0376800;TraesCS6B03G0466500;TraesCS6D03G0324300	K16871+K01580+K00074+K01640+K01580+K01913+K01580+K01913+K17761+K17761+K17761
	Zeatin biosynthesis	ko00908	15	TraesCS1B03G0521500;TraesCS1D03G0282100;TraesCS1D03G0405900;TraesCS2A03G0917400;TraesCS2B03G1223200LC;TraesCS2D03G0653400;TraesCS3A03G0298400;TraesCS3A03G0763900;TraesCS3B03G0876900;TraesCS3D03G0705800;TraesCS5D03G0731700;TraesCS6A03G0723100;TraesCS7B03G0837700;TraesCS7D03G0008100;TraesCS7D03G0910100	K00279+K13496+K00279+K00279+K13496+K13496+K00279+K00279+K00279+K00279+K23452+K23452+K23452+K13496+K23452
	Carbon fixation in photosynthetic organisms	ko00710	21	TraesCS1B03G0202500;TraesCS1D03G0137400;TraesCS1D03G0610200;TraesCS2A03G0131600;TraesCS2B03G0179200;TraesCS2B03G0179300;TraesCS2B03G0995100;TraesCS2D03G0128700;TraesCS2D03G0628500;TraesCS3A03G0316700;TraesCS3A03G0696300;TraesCS3B03G0401400;TraesCS3D03G0317900;TraesCS4B03G0604400;TraesCS5A03G0151800;TraesCS5B03G0163300;TraesCS7B03G0771700;TraesCS7B03G1192800;TraesCS7B03G1193100;TraesCS7D03G0790600…	K00927+K00927+K01006+K01602+K01602+K01602+K01803+K01602+K01807+K01595+K00029+K01595+K01595+K01610+K00814+K00814+K01623+K01803+K01803+K01595+K01803
	Flavone and flavonol biosynthesis	ko00944	9	TraesCS2A03G1066800;TraesCS2D03G0154300;TraesCS3D03G0265100;TraesCS6D03G0755700;TraesCS6D03G0881000;TraesCS7A03G0092900;TraesCS7A03G0998300;TraesCS7B03G0834400;TraesCS7D03G0954300	K13264+K22772+K22771+K13264+K13264+K13083+K05280+K05280+K05280
	Carotenoid biosynthesis	ko00906	26	TraesCS2B03G0704100;TraesCS2B03G0871900;TraesCS2B03G1056300;TraesCS3B03G0790600;TraesCS4A03G0833300;TraesCS4B03G0305100;TraesCS4B03G0824600;TraesCS4D03G0736300;TraesCS5A03G0601100;TraesCS5A03G0898000;TraesCS5A03G1158400;TraesCS5B03G0040800;TraesCS5B03G0068800;TraesCS5B03G0902000;TraesCS5B03G0943700;TraesCS5D03G0099600;TraesCS5D03G0566800;TraesCS5D03G0859900;TraesCS5D03G1152700;TraesCS6A03G0987200…	K09842+K09838+K15746+K17913+K09841+K09838+K15746+K15746+K09843+K09840+K15746+K02291+K09840+K02291+K09840+K09840+K09843+K09840+K09835+K15747+K09843+K15747+K17911+K09842+K09842+K09842
	ABC transporters	ko02010	32	TraesCS1A03G0822900;TraesCS1A03G0823100;TraesCS1B03G0164400;TraesCS1D03G0114000;TraesCS2A03G1332800;TraesCS2B03G1534200;TraesCS2D03G1299900;TraesCS3A03G0269600;TraesCS3A03G0650500;TraesCS3A03G0655700;TraesCS3B03G0353600;TraesCS3B03G0743500;TraesCS3B03G0749000;TraesCS3D03G0261500;TraesCS3D03G0274200;TraesCS3D03G0594600;TraesCS4A03G0062100;TraesCS4A03G0098100;TraesCS4A03G0575400;TraesCS4B03G0218300…	K05658+K05658+K05681+K05681+K05681+K05681+K05681+K05665+K05681+K05677+K05665+K05677+K05658+K05665+K05665+K05677+K05681+K05665+K05681+K05681+K05665+K05681+K05665+K05681+K08712+K05656+K05658+K08712+K05666+K05666+K05666+K05666
	Alanine, aspartate and glutamate metabolism	ko00250	23	TraesCS1B03G1214800;TraesCS2A03G1007000;TraesCS2A03G1187800;TraesCS2A03G1188200;TraesCS2B03G1350800;TraesCS2D03G1140700;TraesCS3A03G0046100;TraesCS3D03G1158300;TraesCS4B03G0101500;TraesCS4B03G0113000;TraesCS4B03G0469500;TraesCS4D03G0084000;TraesCS4D03G0481800;TraesCS4D03G0690600;TraesCS5A03G0151800;TraesCS5B03G0163300;TraesCS5D03G0389800;TraesCS6A03G0376800;TraesCS6B03G0466500;TraesCS6D03G0324300…	K01953+K16871+K13051+K13051+K13051+K13051+K01580+K01580+K01915+K01580+K00827+K01915+K01953+K13566+K00814+K00814+K01953+K17761+K17761+K17761+K00830+K00830+K00830
	Glucosinolate biosynthesis	ko00966	4	TraesCS4B03G0643100;TraesCS4B03G0938300;TraesCS4D03G0823500;TraesCS5A03G1239900	K00826+K00826+K00826+K00826
	Ascorbate and aldarate metabolism	ko00053	21	TraesCS1A03G0651700LC;TraesCS2A03G0760500;TraesCS2D03G0198000LC;TraesCS2D03G0651800LC;TraesCS3D03G0957300;TraesCS4D03G0718400;TraesCS5D03G0472000;TraesCS6A03G0655400;TraesCS6A03G0728900;TraesCS6A03G0729000;TraesCS6B03G0225300;TraesCS6B03G0824200;TraesCS6D03G0543500;TraesCS6D03G0651800;TraesCS6D03G0910500;TraesCS7A03G0884400;TraesCS7B03G0469800;TraesCS7B03G0728600;TraesCS7B03G0737900;TraesCS7D03G0…	K00103+K00434+K12447+K12447+K16190+K00423+K00423+K00128+K08232+K08232+K16190+K00128+K00128+K00128+K00434+K00423+K08232+K00423+K00469+K08232+K00423
	Plant-pathogen interaction	ko04626	179	TraesCS1A03G0164000;TraesCS1A03G0796400;TraesCS1B03G0235700;TraesCS1B03G0499200;TraesCS1B03G0676400;TraesCS1B03G0731600;TraesCS1B03G0915800;TraesCS1B03G1176600;TraesCS1B03G1181300;TraesCS1D03G0061000;TraesCS1D03G0152400;TraesCS1D03G0365600LC;TraesCS1D03G0555000;TraesCS1D03G0566700LC;TraesCS1D03G0607300;TraesCS1D03G0763300;TraesCS1D03G0959800;TraesCS2A03G0002600;TraesCS2A03G0082500;TraesCS2A03G013…	K13430+K05391+K13430+K15397+K13430+K13430+K05391+K15397+K13457+K13457+K13430+K13447+K13430+K13459+K13457+K05391+K15397+K13459+K13459+K13457+K13412+K13435+K13436+K18835+K13436+K13448+K13412+K13458+K13425+K13459+K13436+K13436+K13457+K13430+K13457+K13448+K13458+K13416+K13425+K13457+K13436+K13457+K18878+K13448+K13458+K13416+K13425+K13457+K13457+K13457+K13430+K13448+K13425+K16224+K16224+K18878+K13448+…
	Ubiquinone and other terpenoid-quinone biosynthesis	ko00130	12	TraesCS1A03G0528300;TraesCS1A03G0584500;TraesCS1B03G0617700;TraesCS2A03G0676300;TraesCS3B03G1050600;TraesCS4D03G0017700;TraesCS5B03G0501600;TraesCS6A03G0721400;TraesCS7A03G1265600;TraesCS7B03G0593600;TraesCS7B03G1183200;TraesCS7D03G0732500	K01904+K09834+K01904+K01904+K01904+K12502+K02552+K05928+K12501+K14760+K12501+K14760
	Taurine and hypotaurine metabolism	ko00430	3	TraesCS3A03G0046100;TraesCS3D03G1158300;TraesCS4B03G0113000	K01580+K01580+K01580
	Selenocompound metabolism	ko00450	3	TraesCS4D03G0145300;TraesCS5B03G0967700;TraesCS5D03G0877500	K08247+K13811+K13811
	Cysteine and methionine metabolism	ko00270	38	TraesCS1A03G0175800;TraesCS1B03G0320200;TraesCS1D03G0170700;TraesCS1D03G0230600;TraesCS2A03G0537200;TraesCS2B03G0658900;TraesCS2B03G1435300;TraesCS2D03G0539700;TraesCS3A03G0187800;TraesCS3D03G0660100;TraesCS4A03G0747300;TraesCS4B03G0469500;TraesCS4B03G0643100;TraesCS4B03G0938300;TraesCS4D03G0823500;TraesCS5A03G0594900;TraesCS5A03G0595000;TraesCS5A03G1239900;TraesCS5B03G0391600;TraesCS5B03G0579900…	K01919+K05933+K01919+K05933+K00558+K00558+K00899+K00558+K16054+K00640+K00641+K00827+K00826+K00826+K00826+K05933+K05933+K00826+K00003+K01611+K05933+K00003+K05933+K01611+K01611+K00558+K01611+K01611+K00558+K01011+K01611+K01611+K00789+K05933+K00558+K00558+K00058+K00558
	Thiamine metabolism	ko00730	8	TraesCS1D03G0571800;TraesCS2A03G0118900;TraesCS2A03G0701900;TraesCS2B03G0781000;TraesCS3D03G1026600;TraesCS7B03G0774900;TraesCS7D03G0890900;TraesCSU03G0022100	K00949+K22911+K06949+K06949+K00878+K00939+K00939+K22911
	Isoflavonoid biosynthesis	ko00943	4	TraesCS2A03G1066800;TraesCS5B03G0998600;TraesCS6D03G0755700;TraesCS6D03G0881000	K13264+K13260+K13264+K13264
	alpha-Linolenic acid metabolism	ko00592	20	TraesCS1A03G0676700;TraesCS1D03G0244200;TraesCS1D03G0640900;TraesCS2B03G0983100;TraesCS2D03G0246600;TraesCS2D03G0833700;TraesCS3A03G0644100;TraesCS3B03G1251800;TraesCS4A03G0540100;TraesCS4B03G0241100;TraesCS4B03G0597200;TraesCS4D03G0203800;TraesCS4D03G0390100LC;TraesCS5D03G0913500;TraesCS5D03G0964200LC;TraesCS6A03G0662100;TraesCS6A03G0861500;TraesCS6B03G1030800;TraesCS7B03G0116500;TraesCS7D03G032…	K16818+K16818+K16818+K16818+K16818+K16818+K16818+K16818+K18857+K18857+K01047+K18857+K22389+K01723+K18857+K16818+K10525+K10525+K00232+K00232
	Ether lipid metabolism	ko00565	11	TraesCS1A03G0481600;TraesCS1B03G1039700;TraesCS2A03G0800300;TraesCS2A03G1360500;TraesCS2B03G1562400;TraesCS2D03G1331600;TraesCS3A03G0288100;TraesCS3B03G0355200;TraesCS4B03G0597200;TraesCS4B03G0967400;TraesCS6A03G0160900	K01062+K01115+K06123+K01115+K01115+K01115+K01115+K01115+K01047+K01115+K00993
	Pyrimidine metabolism	ko00240	28	TraesCS1A03G0138300;TraesCS1B03G0187500;TraesCS2A03G0070400;TraesCS2A03G0680300;TraesCS2D03G0066000;TraesCS3A03G0609400;TraesCS3A03G0747300;TraesCS3B03G0371300;TraesCS3B03G0409400;TraesCS3B03G0690200;TraesCS3D03G0559500;TraesCS3D03G0688000;TraesCS4A03G0746100;TraesCS4B03G0040900;TraesCS4B03G0939500;TraesCS4D03G0028900;TraesCS5A03G0036800;TraesCS5B03G0029500;TraesCS5D03G0047500;TraesCS6A03G0946800…	K01240+K01240+K13800+K16904+K13800+K01937+K01493+K13800+K01513+K01937+K01937+K01493+K01520+K01520+K14641+K01520+K01520+K01520+K01520+K10807+K00876+K10807+K10808+K10807+K10808+K10807+K10808+K14641
	Lysine degradation	ko00310	16	TraesCS1A03G0102900;TraesCS1D03G0090300;TraesCS3B03G1174400;TraesCS3D03G0954700;TraesCS4A03G0032600;TraesCS4D03G0458400;TraesCS4D03G0673300;TraesCS5A03G0677100;TraesCS5B03G0904600;TraesCS5D03G0648100;TraesCS6A03G0655400;TraesCS6B03G0824200;TraesCS6D03G0543500;TraesCS6D03G0651800;TraesCS6D03G0761100;TraesCS7A03G0303400	K11420+K11420+K11420+K11420+K11426+K11430+K11426+K00306+K11422+K00306+K00128+K00128+K00128+K00128+K14157+K11430
	Nicotinate and nicotinamide metabolism	ko00760	9	TraesCS1A03G0138300;TraesCS1B03G0187500;TraesCS2A03G0316200;TraesCS2B03G0434200;TraesCS2D03G0331600;TraesCS3A03G1162900;TraesCS3B03G0409400;TraesCS5A03G0490700;TraesCS5B03G0493400	K01240+K01240+K18551+K18551+K18551+K00858+K01513+K00858+K00858
	Nitrogen metabolism	ko00910	4	TraesCS1B03G0505400LC;TraesCS4B03G0101500;TraesCS4D03G0084000;TraesCS6D03G0042700	K01674+K01915+K01915+K10534
	Valine, leucine and isoleucine degradation	ko00280	20	TraesCS1A03G1016000;TraesCS1B03G0217100;TraesCS1B03G1197900;TraesCS2D03G1008000;TraesCS3B03G0922500;TraesCS4B03G0469500;TraesCS4B03G0643100;TraesCS4B03G0938300;TraesCS4D03G0823500;TraesCS5A03G1239900;TraesCS6A03G0376400;TraesCS6A03G0655400;TraesCS6B03G0465700;TraesCS6B03G0824200;TraesCS6B03G0978500;TraesCS6D03G0323900;TraesCS6D03G0543500;TraesCS6D03G0551000;TraesCS6D03G0651800;TraesCS6D03G0698200	K01968+K00253+K01968+K05607+K01640+K00827+K00826+K00826+K00826+K00826+K01968+K00128+K01968+K00128+K00020+K01968+K00128+K05607+K00128+K00020
	Sulfur metabolism	ko00920	9	TraesCS2B03G0603800;TraesCS3D03G0660100;TraesCS4A03G0747300;TraesCS4A03G0994400;TraesCS4B03G0692700;TraesCS4D03G0620200;TraesCS5B03G0967700;TraesCS5D03G0877500;TraesCS6D03G0285100	K05907+K00640+K00641+K15422+K00860+K00860+K13811+K13811+K01011
	Steroid biosynthesis	ko00100	8	TraesCS3A03G0320700;TraesCS4A03G0581500;TraesCS4A03G0633800;TraesCS4A03G0650000LC;TraesCS4B03G0222400;TraesCS4D03G0183200;TraesCS5A03G1180300;TraesCS7B03G1168000	K09832+K14423+K08246+K00511+K14423+K14423+K14423+K08242
	Glycerophospholipid metabolism	ko00564	55	TraesCS1A03G0276200;TraesCS1A03G0610900;TraesCS1A03G0676700;TraesCS1A03G0920800;TraesCS1B03G0362100;TraesCS1B03G0419300;TraesCS1B03G0702400;TraesCS1B03G0888700LC;TraesCS1B03G1039700;TraesCS1B03G1053700;TraesCS1D03G0244200;TraesCS1D03G0578600;TraesCS1D03G0640900;TraesCS1D03G0874600;TraesCS2A03G0800300;TraesCS2A03G1360500;TraesCS2B03G0983100;TraesCS2B03G1562400;TraesCS2D03G0246600;TraesCS2D03G08337…	K01126+K00901+K16818+K08730+K01126+K13508+K00901+K00006+K01115+K05929+K16818+K00901+K16818+K05929+K06123+K01115+K16818+K01115+K16818+K16818+K01115+K06129+K01115+K06130+K16818+K01126+K00901+K01094+K08730+K01115+K01126+K18696+K08730+K16818+K01126+K00901+K18696+K13508+K08730+K01047+K01115+K22389+K13508+K00967+K00967+K00894+K00993+K01613+K16818+K01613+K01126+K18696+K01126+K01126+K01517
	Starch and sucrose metabolism	ko00500	138	TraesCS1A03G0121000;TraesCS1A03G0492600;TraesCS1A03G0568300;TraesCS1A03G0608300;TraesCS1A03G0869800;TraesCS1A03G0880600;TraesCS1A03G1024400;TraesCS1B03G0185400;TraesCS1B03G0388600;TraesCS1B03G0647100;TraesCS1B03G0659600;TraesCS1B03G1004700;TraesCS1B03G1027600;TraesCS1B03G1206000;TraesCS1D03G0124200;TraesCS1D03G0544300;TraesCS1D03G0805800;TraesCS1D03G0983500;TraesCS2A03G0013700;TraesCS2A03G0074000…	K19891+K01194+K01177+K19893+K00844+K01179+K00975+K19891+K00844+K01087+K01177+K00703+K01179+K00975+K19891+K01177+K16055+K00975+K00844+K05350+K19892+K19891+K19891+K13679+K01193+K00695+K19891+K01193+K01193+K01193+K01188+K19892+K19891+K19892+K01176+K01193+K00696+K01176+K00844+K01513+K01188+K19891+K19892+K19891+K19891+K00844+K19893+K00696+K19891+K19891+K19891+K00847+K00844+K19892+K19891+K19891+K19893+…
	Fructose and mannose metabolism	ko00051	31	TraesCS1A03G0847500;TraesCS1A03G0869800;TraesCS1B03G0388600;TraesCS1B03G0974500;TraesCS1D03G0815700;TraesCS2A03G0013700;TraesCS2B03G0904800;TraesCS2B03G0995100;TraesCS3A03G0235600;TraesCS3A03G0619900;TraesCS3A03G1128800;TraesCS3B03G0296600;TraesCS3B03G0699000;TraesCS3B03G0790300;TraesCS3B03G1308200;TraesCS3D03G0567700;TraesCS3D03G0631200;TraesCS3D03G0870400;TraesCS3D03G1050300;TraesCS4A03G0192700…	K00850+K00844+K00844+K00850+K00850+K00844+K00850+K01803+K00850+K19355+K00844+K00850+K19355+K19355+K00844+K19355+K19355+K00847+K00844+K00966+K00850+K02377+K00008+K00847+K00847+K01623+K01803+K01803+K00008+K00847+K01803
	mRNA surveillance pathway	ko03015	16	TraesCS1A03G0610600;TraesCS1B03G0703000;TraesCS1D03G0579100;TraesCS2A03G0198000;TraesCS2D03G0994200;TraesCS3B03G0800700;TraesCS3B03G0931400LC;TraesCS4A03G0676900;TraesCS5B03G1315100;TraesCS5D03G1173700;TraesCS6A03G0823200;TraesCS6B03G0978000;TraesCS6D03G0696600;TraesCS7A03G0810200;TraesCS7B03G0647600;TraesCS7D03G0774600	K03265+K03265+K03265+K14376+K14416+K14400+K14404+K14399+K14399+K14399+K14396+K14396+K14396+K14397+K14397+K14397
	Anthocyanin biosynthesis	ko00942	1	TraesCS7A03G0362100	K12930
	Spliceosome	ko03040	46	TraesCS1A03G0597400;TraesCS1A03G0694200;TraesCS1B03G0531100;TraesCS1B03G0693100;TraesCS1B03G0791600;TraesCS1B03G1074900;TraesCS1B03G1168800;TraesCS1D03G0410600;TraesCS1D03G0569500;TraesCS1D03G0660300;TraesCS2D03G0523800;TraesCS3A03G0341200;TraesCS3A03G0663200;TraesCS3A03G0917300;TraesCS3A03G1172500;TraesCS3B03G0416800;TraesCS3B03G0518600;TraesCS3B03G1017600;TraesCS3B03G1033800;TraesCS3D03G0838100…	K12890+K03283+K12859+K12890+K03283+K12820+K11094+K12859+K12890+K03283+K12885+K12842+K12890+K12741+K12741+K12842+K12818+K12859+K12741+K12741+K03283+K12823+K03283+K03283+K03283+K12897+K12818+K12885+K03283+K03283+K12843+K03283+K03283+K12741+K03283+K03283+K12741+K03283+K03283+K03283+K12741+K12741+K03283+K12741+K12836+K12836
	RNA degradation	ko03018	21	TraesCS1A03G0847500;TraesCS1B03G0639400;TraesCS1B03G0974500;TraesCS1D03G0815700;TraesCS2A03G0703000;TraesCS2B03G0294200;TraesCS2B03G0782200;TraesCS2B03G0904800;TraesCS2D03G0651000;TraesCS3A03G0235600;TraesCS3B03G0296600;TraesCS4D03G0521300;TraesCS4D03G0645900;TraesCS5A03G0210700LC;TraesCS5B03G1060800;TraesCS5D03G1218300;TraesCS6A03G0648400;TraesCS7A03G1191400;TraesCS7B03G1070000;TraesCS7D03G01649…	K00850+K12600+K00850+K00850+K01689+K03654+K01689+K00850+K01689+K00850+K00850+K01689+K12591+K12605+K00850+K12590+K12614+K01689+K01689+K01689+K01689
	Riboflavin metabolism	ko00740	10	TraesCS2D03G0799200;TraesCS3B03G0409400;TraesCS4B03G0628700;TraesCS4D03G0558200;TraesCS5A03G0238100;TraesCS5A03G1224000;TraesCS5D03G0249800;TraesCS6B03G0652700;TraesCS7A03G1006400;TraesCS7D03G0810700	K20884+K01513+K14379+K14379+K00793+K11752+K00793+K14652+K14652+K20884
	DNA replication	ko03030	61	TraesCS1A03G0206300;TraesCS1A03G0324600;TraesCS1A03G0592900;TraesCS1A03G0672700;TraesCS1A03G0746700;TraesCS1A03G0840800;TraesCS1B03G0274800;TraesCS1B03G0400700;TraesCS1B03G0452400;TraesCS1B03G0687900;TraesCS1B03G0764600;TraesCS1B03G0851000;TraesCS1D03G0199500;TraesCS1D03G0298800;TraesCS1D03G0564500;TraesCS1D03G0636300;TraesCS1D03G0713800;TraesCS1D03G0809400;TraesCS2A03G0827100LC;TraesCS2A03G08890…	K07466+K02542+K02684+K02540+K02541+K03505+K07466+K02542+K02324+K02684+K02540+K02541+K07466+K02542+K02684+K02540+K02541+K03505+K10744+K04802+K10744+K04802+K04802+K02325+K03504+K07466+K10740+K02212+K10740+K02212+K02325+K10740+K02212+K07466+K07466+K10756+K07466+K07466+K02326+K07466+K02328+K02210+K02210+K10743+K02210+K02209+K04802+K10739+K10745+K02209+K04802+K10739+K02209+K04802+K10739+K10739+K02321+…
	Mismatch repair	ko03430	39	TraesCS1A03G0206300;TraesCS1A03G0840800;TraesCS1B03G0274800;TraesCS1D03G0199500;TraesCS1D03G0318200;TraesCS1D03G0809400;TraesCS2A03G0889000;TraesCS2A03G1299200;TraesCS2B03G0979500;TraesCS2D03G0514300;TraesCS2D03G0831300;TraesCS2D03G1262600;TraesCS3A03G0256600;TraesCS3A03G0310800;TraesCS3A03G0336800;TraesCS3A03G0408000;TraesCS3B03G0323600;TraesCS3B03G0495200;TraesCS3D03G0248000;TraesCS3D03G0388500…	K07466+K03505+K07466+K07466+K08735+K03505+K04802+K07456+K04802+K03657+K04802+K07456+K08737+K03504+K07466+K10740+K08737+K10740+K08737+K10740+K07466+K07466+K10756+K07466+K07466+K07466+K02328+K04802+K10739+K04802+K10739+K04802+K10739+K10739+K10746+K07466+K07466+K10746+K08734
	Pentose phosphate pathway	ko00030	14	TraesCS1A03G0847500;TraesCS1B03G0974500;TraesCS1D03G0815700;TraesCS2A03G0397000;TraesCS2B03G0522600;TraesCS2B03G0904800;TraesCS2D03G0628500;TraesCS3A03G0235600;TraesCS3B03G0296600;TraesCS5B03G1060800;TraesCS6A03G0349700;TraesCS6B03G0445500;TraesCS7B03G0771700;Triticum_aestivum_newGene_8807	K00850+K00850+K00850+K00131+K00131+K00850+K01807+K00850+K00850+K00850+K00036+K00036+K01623+K00036
	Purine metabolism	ko00230	31	TraesCS2A03G0171100;TraesCS2A03G0874800;TraesCS2B03G0362200;TraesCS2B03G0969500;TraesCS2D03G0818100;TraesCS3A03G0888400;TraesCS3B03G0409400;TraesCS3B03G1014900;TraesCS4A03G0513100;TraesCS4B03G0692700;TraesCS4B03G0939500;TraesCS4D03G0620200;TraesCS5B03G0967700;TraesCS5D03G0877500;TraesCS6A03G0633300;TraesCS6A03G0946800;TraesCS6B03G0740100;TraesCS6D03G0509900;TraesCS7A03G0308900;TraesCS7A03G0479300…	K01490+K00759+K01488+K00759+K00759+K00365+K01513+K00365+K01522+K00860+K14641+K00860+K13811+K13811+K00759+K10807+K00759+K00759+K10807+K10808+K02083+K10807+K10808+K00939+K02083+K10807+K10808+K01517+K00939+K02083+K14641
	Autophagy - other	ko04136	6	TraesCS3B03G1114900;TraesCS4A03G0556700;TraesCS4B03G0257100;TraesCS4D03G0220200;TraesCS6A03G0354900;TraesCS6A03G0923200	K08343+K08331+K08331+K08331+K08330+K08333
	Inositol phosphate metabolism	ko00562	40	TraesCS1A03G0032500;TraesCS1A03G0821600;TraesCS1B03G0946400;TraesCS1D03G0023900;TraesCS1D03G0164800;TraesCS1D03G0790700;TraesCS2A03G0236200;TraesCS2A03G0401800;TraesCS2B03G0326000;TraesCS2B03G0995100;TraesCS2D03G0405200;TraesCS2D03G1110400LC;TraesCS3A03G0249800;TraesCS3A03G0628400;TraesCS3B03G0078600;TraesCS3B03G0318800;TraesCS3B03G0714000;TraesCS3D03G0581400;TraesCS4A03G0055000;TraesCS4A03G06501…	K00889+K00913+K00913+K00889+K05857+K00913+K18081+K05857+K18081+K01803+K05857+K10572+K01106+K20279+K18081+K01106+K20279+K20279+K24221+K19517+K00889+K15422+K24221+K01099+K18081+K18081+K01099+K18081+K01099+K01092+K00913+K00915+K01099+K00469+K00915+K01803+K01803+K18081+K00915+K01803
	Porphyrin and chlorophyll metabolism	ko00860	10	TraesCS1A03G0847100;TraesCS1B03G0563600;TraesCS2D03G0286500;TraesCS3D03G0543900;TraesCS5A03G0855000;TraesCS5D03G1030900;TraesCS6D03G0207700;TraesCS7A03G0913800;TraesCS7A03G1003500;TraesCS7B03G0066800	K01885+K02492+K03403+K02303+K08099+K13071+K01698+K21480+K01845+K02492
	Synthesis and degradation of ketone bodies	ko00072	1	TraesCS3B03G0922500	K01640
	Base excision repair	ko03410	22	TraesCS1A03G0840800;TraesCS1B03G0452400;TraesCS1D03G0809400;TraesCS2A03G0889000;TraesCS2B03G0979500;TraesCS2B03G1455800;TraesCS2D03G0831300;TraesCS3A03G0258700;TraesCS3A03G0310800;TraesCS3A03G0839800;TraesCS3B03G0964100;TraesCS3D03G0251000;TraesCS3D03G0770700;TraesCS4D03G0012200;TraesCS4D03G0742900;TraesCS5A03G1007000;TraesCS5B03G1053000;TraesCS6A03G0948100;TraesCS6B03G1159400;TraesCS6D03G0826300…	K03505+K02324+K03505+K04802+K04802+K03648+K04802+K02325+K03504+K01246+K01246+K02325+K01246+K02326+K02328+K10569+K10569+K04802+K04802+K04802+K03575+K03575
	Plant hormone signal transduction	ko04075	186	TraesCS1A03G0190200;TraesCS1A03G0201700;TraesCS1A03G0514200;TraesCS1A03G0655800;TraesCS1A03G0685600;TraesCS1A03G0875600;TraesCS1A03G0981100;TraesCS1A03G1005000;TraesCS1B03G0257300;TraesCS1B03G0270100;TraesCS1B03G0494000;TraesCS1B03G0603200;TraesCS1B03G0660400;TraesCS1B03G0743300;TraesCS1B03G0779800;TraesCS1B03G0803700;TraesCS1B03G1022100;TraesCS1B03G1164500;TraesCS1B03G1186600;TraesCS1D03G0184300…	K13946+K12126+K14496+K14493+K14498+K14497+K13415+K14497+K13946+K12126+K13415+K14496+K14498+K14493+K14498+K13463+K14497+K13415+K14497+K13946+K12126+K13415+K14493+K14498+K14431+K13946+K13415+K14497+K14509+K13415+K14509+K14497+K14514+K13415+K14487+K13415+K14503+K14494+K14491+K14492+K13415+K14498+K14510+K14514+K13415+K14493+K14487+K14491+K14492+K13415+K13415+K13416+K14498+K14497+K14514+K13415+K14487+…
	Brassinosteroid biosynthesis	ko00905	9	TraesCS1A03G0653000;TraesCS2A03G0027900;TraesCS2A03G0818100;TraesCS2D03G0759600;TraesCS3A03G0227000;TraesCS3D03G0218600;TraesCS5A03G0368600;TraesCS5B03G0369000;TraesCS7A03G0908400	K15639+K09590+K12639+K12639+K09589+K09589+K09588+K09588+K15639
	Protein processing in endoplasmic reticulum	ko04141	59	TraesCS1A03G0694200;TraesCS1A03G0718900;TraesCS1B03G0791600;TraesCS1B03G0819700;TraesCS1B03G1245800;TraesCS1D03G0600900;TraesCS1D03G0660300;TraesCS1D03G0670400;TraesCS1D03G0681600;TraesCS1D03G0719600;TraesCS1D03G1009900;TraesCS2A03G0758400;TraesCS2A03G0906000;TraesCS2B03G1001700LC;TraesCS2B03G1156600;TraesCS2D03G0699500;TraesCS2D03G0974700;TraesCS3B03G0108500;TraesCS3B03G1286400LC;TraesCS3D03G003…	K03283+K10575+K03283+K10575+K10661+K10956+K03283+K11863+K10575+K06689+K10661+K09580+K10666+K09561+K10839+K09580+K10839+K13993+K01230+K10661+K13993+K03283+K10956+K03283+K10956+K03283+K03283+K03283+K10956+K04374+K03283+K13993+K03094+K03283+K13993+K03283+K03283+K03283+K13993+K03283+K09523+K03283+K03283+K13993+K13993+K04079+K10839+K14012+K13993+K13993+K13993+K13993+K04079+K03283+K10839+K13993+K10839+…
	Diterpenoid biosynthesis	ko00904	17	TraesCS1A03G0823000;TraesCS1D03G0796500;TraesCS2D03G0112500;TraesCS2D03G0126700LC;TraesCS3A03G0167600LC;TraesCS3D03G0675100;TraesCS5B03G0488500LC;TraesCS5B03G1356500;TraesCS5D03G1210400;TraesCS6A03G0611100;TraesCS6B03G0573600LC;TraesCS6B03G0761500;TraesCS7A03G0637600;TraesCS7D03G0618400;TraesCS7D03G0850500;TraesCSU03G0017700;TraesCSU03G0017800	K04124+K04125+K13070+K16085+K04125+K04125+K04125+K05282+K05282+K04125+K04125+K04125+K16085+K16085+K04122+K16085+K16085
	Aminoacyl-tRNA biosynthesis	ko00970	22	TraesCS1A03G0847100;TraesCS1B03G1044700;TraesCS1D03G0866700;TraesCS2D03G1114500;TraesCS3A03G0351000;TraesCS3A03G0654100;TraesCS3A03G0721600;TraesCS3B03G0765700;TraesCS3B03G1013900;TraesCS3D03G0341900;TraesCS3D03G0665200;TraesCS4A03G0195900;TraesCS4A03G0576700;TraesCS4B03G0579100;TraesCS4D03G0181100;TraesCS4D03G0205900;TraesCS4D03G0514100;TraesCS4D03G0750600LC;TraesCS5D03G0431100;TraesCS6B03G06479…	K01885+K02433+K02433+K02433+K01870+K02433+K01870+K00604+K01870+K01870+K01870+K01872+K01870+K01872+K01870+K01870+K01872+K22503+K01870+K22503+K01870+K02433
	Biosynthesis of unsaturated fatty acids	ko01040	12	TraesCS2B03G0205900;TraesCS3A03G0164700;TraesCS3A03G0859400;TraesCS3B03G0984000;TraesCS3B03G1117200;TraesCS3D03G0788100;TraesCS5A03G0599200;TraesCS6B03G1132900LC;TraesCS7A03G0222800;TraesCS7A03G0456900;TraesCS7B03G0116500;TraesCS7D03G0321800	K03921+K10258+K03921+K03921+K03921+K03921+K03921+K10258+K10251+K03921+K00232+K00232
	Phosphatidylinositol signaling system	ko04070	41	TraesCS1A03G0032500;TraesCS1A03G0610900;TraesCS1A03G0821600;TraesCS1B03G0702400;TraesCS1B03G0946400;TraesCS1D03G0023900;TraesCS1D03G0164800;TraesCS1D03G0578600;TraesCS1D03G0790700;TraesCS2A03G0236200;TraesCS2A03G0401800;TraesCS2B03G0326000;TraesCS2D03G0405200;TraesCS2D03G1110400LC;TraesCS3A03G0249800;TraesCS3A03G0628400;TraesCS3A03G0775100;TraesCS3B03G0078600;TraesCS3B03G0318800;TraesCS3B03G07140…	K00889+K00901+K00913+K00901+K00913+K00889+K05857+K00901+K00913+K18081+K05857+K18081+K05857+K10572+K01106+K20279+K00901+K18081+K01106+K20279+K20279+K00901+K02183+K00889+K15422+K02183+K02183+K01099+K18081+K18081+K01099+K18081+K01099+K02183+K01092+K00913+K00915+K01099+K00915+K18081+K00915
	Amino sugar and nucleotide sugar metabolism	ko00520	48	TraesCS1A03G0782200;TraesCS1A03G0869800;TraesCS1A03G1024400;TraesCS1B03G0388600;TraesCS1B03G0873800;TraesCS1B03G1206000;TraesCS1D03G0523300;TraesCS1D03G0983500;TraesCS2A03G0013700;TraesCS2A03G0066500;TraesCS2A03G0201000;TraesCS2A03G0266500;TraesCS2B03G0317100;TraesCS2B03G0949900;TraesCS2D03G0061200;TraesCS2D03G0198000LC;TraesCS2D03G0234900;TraesCS2D03G0651800LC;TraesCS2D03G0798400;TraesCS2D03G117…	K12450+K00844+K00975+K00844+K00770+K00975+K20547+K00975+K00844+K20547+K01209+K01097+K08678+K01183+K20547+K12447+K08678+K12447+K01183+K15920+K00844+K00844+K13379+K00847+K16190+K00844+K00966+K15920+K01183+K15920+K00770+K00975+K00770+K13648+K00975+K08679+K08678+K12451+K16190+K08679+K12446+K02377+K00847+K00847+K13648+K08679+K00847+K13648
	Tyrosine metabolism	ko00350	13	TraesCS2B03G0210000;TraesCS2B03G0457300;TraesCS2D03G0146700;TraesCS4A03G0540100;TraesCS4A03G1070400;TraesCS4B03G0241100;TraesCS4B03G0619700;TraesCS4B03G0798300;TraesCS4B03G0798400;TraesCS4B03G0907800;TraesCS4D03G0203800;TraesCS5D03G0964200LC;TraesCS7D03G0120600	K00276+K00121+K00276+K18857+K01593+K18857+K00276+K00121+K00121+K01593+K18857+K18857+K01593
	Monobactam biosynthesis	ko00261	2	TraesCS5B03G0967700;TraesCS5D03G0877500	K13811+K13811
	Homologous recombination	ko03440	49	TraesCS1A03G0059500;TraesCS1A03G0206300;TraesCS1A03G0757200;TraesCS1A03G0817000;TraesCS1A03G0840800;TraesCS1B03G0274800;TraesCS1B03G0941800;TraesCS1D03G0199500;TraesCS1D03G0786900;TraesCS1D03G0809400;TraesCS2A03G0932200;TraesCS2A03G0936100;TraesCS2B03G0260900;TraesCS2B03G0563900;TraesCS2B03G1030400;TraesCS2B03G1364600;TraesCS2D03G0194000;TraesCS2D03G0451500;TraesCS2D03G0870500;TraesCS2D03G0877500…	K10728+K07466+K10683+K10683+K03505+K07466+K10683+K07466+K10683+K03505+K10683+K10728+K10728+K10870+K10728+K10882+K10728+K10870+K10683+K10728+K03504+K07466+K10740+K08991+K10740+K08991+K08775+K10740+K12173+K07466+K07466+K12173+K07466+K03165+K07466+K12173+K12173+K07466+K02328+K15362+K15362+K10728+K10739+K10739+K10739+K10739+K07466+K07466+K08991
	Terpenoid backbone biosynthesis	ko00900	7	TraesCS3A03G0595400;TraesCS4A03G0082700;TraesCS4D03G0626800;TraesCS7A03G0364300;TraesCS7A03G0571800;TraesCS7B03G0386400;TraesCS7D03G0553900	K15889+K11778+K11778+K01597+K00021+K00021+K00021
	One carbon pool by folate	ko00670	2	TraesCS1B03G0326400;TraesCS3B03G0765700	K00288+K00604
CM42CK_vs_CM42CT	Isoquinoline alkaloid biosynthesis	ko00950	8	TraesCS2A03G0826800;TraesCS2B03G0210000;TraesCS2B03G0328800;TraesCS2B03G0913900;TraesCS2D03G0146700;TraesCS4B03G0619700;TraesCS7B03G0725100;TraesCS7D03G0120600	K00276+K00276+K00815+K00276+K00276+K00276+K21580+K01593
	Ribosome	ko03010	54	TraesCS1A03G0141300;TraesCS1A03G0994600;TraesCS1B03G0822100;TraesCS1B03G1037200LC;TraesCS1B03G1114400;TraesCS1B03G1177500;TraesCS1D03G0128800;TraesCS1D03G0909600;TraesCS1D03G0916400;TraesCS1D03G0960400;TraesCS2A03G0457300LC;TraesCS2B03G0576800LC;TraesCS2B03G1353600;TraesCS2D03G0372700;TraesCS2D03G0464900LC;TraesCS3A03G0399600;TraesCS3A03G0705400;TraesCS3A03G1012500;TraesCS3B03G0037300;TraesCS3B03…	K02864+K02935+K02957+K02959+K02921+K02935+K02864+K02917+K02921+K02935+K02923+K02923+K02964+K02894+K02923+K02882+K02887+K02899+K02940+K02882+K02921+K02871+K02899+K02882+K02899+K02978+K02990+K02881+K02897+K02884+K02927+K02897+K02933+K02927+K02919+K02920+K02927+K02864+K02881+K02904+K02922+K02939+K02926+K02995+K02983+K02904+K02955+K02915+K02929+K02916+K02915+K02901+K02929+K02916
	Sphingolipid metabolism	ko00600	14	TraesCS2A03G0391700;TraesCS2D03G0416500;TraesCS2D03G0909100;TraesCS3A03G0533500;TraesCS3A03G0785800LC;TraesCS3B03G0286700;TraesCS3B03G0505300LC;TraesCS3B03G0615500;TraesCS3B03G0619400LC;TraesCS3D03G0221000;TraesCS3D03G0496500;TraesCS4B03G0630500;TraesCS6A03G0796300;TraesCS7D03G0753800	K12309+K12309+K12309+K12309+K17108+K12309+K12349+K12309+K12309+K12309+K12309+K12309+K07407+K17108
	Biotin metabolism	ko00780	7	TraesCS1D03G0896600;TraesCS2A03G0926800;TraesCS2B03G1018900;TraesCS2D03G0866400;TraesCS5B03G0976900;TraesCS5D03G0886000;TraesCS7A03G0567900	K00059+K02372+K02372+K02372+K00059+K00059+K00059
	Diterpenoid biosynthesis	ko00904	9	TraesCS2A03G0251600LC;TraesCS2B03G0019800;TraesCS2B03G0653800LC;TraesCS2D03G0262800;TraesCS5B03G0488500LC;TraesCS5D03G1210400;TraesCS6B03G0573600LC;TraesCS6B03G0761500;TraesCS7D03G0850500	K13070+K16085+K04125+K13070+K04125+K05282+K04125+K04125+K04122
	Brassinosteroid biosynthesis	ko00905	4	TraesCS1D03G0611300;TraesCS2A03G1020100;TraesCS3A03G0227000;TraesCS5B03G0369000	K15639+K20623+K09589+K09588
	mRNA surveillance pathway	ko03015	16	TraesCS1A03G0610600;TraesCS1B03G0703000;TraesCS2A03G0655400LC;TraesCS3B03G0800700;TraesCS4A03G0486500;TraesCS5A03G0210500;TraesCS5A03G0430300;TraesCS5A03G0464900;TraesCS5B03G0460200;TraesCS5D03G0399200;TraesCS5D03G0429800;TraesCS5D03G1173700;TraesCS6B03G0594300;TraesCS6D03G0696600;TraesCS7A03G0810200;TraesCS7D03G0774600	K03265+K03265+K13171+K14400+K12881+K13025+K12881+K13126+K13126+K12881+K13126+K14399+K14376+K14396+K14397+K14397
	Propanoate metabolism	ko00640	3	TraesCS3D03G0668700;TraesCS6B03G0061000LC;TraesCS7D03G0321800	K05605+K11262+K00232
	Phenylalanine metabolism	ko00360	14	TraesCS1B03G0108400;TraesCS1B03G1202000;TraesCS1D03G0980000;TraesCS2A03G0826800;TraesCS2B03G0210000;TraesCS2B03G0328800;TraesCS2B03G0913900;TraesCS2D03G0146700;TraesCS2D03G0647600LC;TraesCS3A03G0786300;TraesCS4A03G0174000;TraesCS4B03G0619700;TraesCS4D03G0070300;TraesCS7D03G0120600	K10775+K01426+K01426+K00276+K00276+K00815+K00276+K00276+K01426+K00074+K01426+K00276+K01426+K01593
	Histidine metabolism	ko00340	4	TraesCS1A03G0803800;TraesCS1B03G0371700LC;TraesCS1B03G0925400;TraesCS1D03G0772600	K14152+K18649+K14152+K14152
	Purine metabolism	ko00230	24	TraesCS1A03G0494500;TraesCS1B03G0501900;TraesCS1B03G1026900;TraesCS1D03G0380400;TraesCS1D03G0853200;TraesCS2A03G0874800;TraesCS2B03G0969500;TraesCS2D03G0818100;TraesCS2D03G1218600;TraesCS3A03G0888400;TraesCS4A03G0088700;TraesCS4A03G0899800;TraesCS4B03G0692700;TraesCS4D03G0620200;TraesCS5A03G0173200;TraesCS5B03G1207600;TraesCS5D03G0254600LC;TraesCS6A03G0633300;TraesCS6B03G0740100;TraesCS6D03G05099…	K00106+K01952+K01952+K01952+K01952+K00759+K00759+K00759+K00939+K00365+K00860+K01933+K00860+K00860+K00759+K01427+K00873+K00759+K00759+K00759+K00939+K00939+K02083+K02083
	Glutathione metabolism	ko00480	33	TraesCS1A03G0249100;TraesCS1A03G0502000;TraesCS1D03G0486800;TraesCS1D03G0619800;TraesCS2A03G1173500;TraesCS3A03G0294000;TraesCS3B03G0362500;TraesCS3D03G0280000;TraesCS4A03G0213000;TraesCS4B03G0096500;TraesCS4B03G0400200LC;TraesCS4B03G0558200;TraesCS4B03G0857200;TraesCS4D03G0333000LC;TraesCS4D03G0493300;TraesCS5A03G0814600LC;TraesCS5A03G1177200;TraesCS5D03G0769300;TraesCS6A03G0152600;TraesCS6A03G0…	K00799+K00799+K00799+K00799+K00799+K00799+K00799+K00799+K00799+K00799+K00799+K00799+K00799+K22596+K00799+K00799+K00799+K00799+K22596+K01255+K22596+K00036+K01255+K01255+K00432+K21888+K00799+K00432+K21888+K00799+K00432+K21888+K01256
	Glycine, serine and threonine metabolism	ko00260	17	TraesCS2A03G0826800;TraesCS2B03G0210000;TraesCS2B03G0913900;TraesCS2D03G0146700;TraesCS3A03G1239300LC;TraesCS4B03G0469500;TraesCS4B03G0619700;TraesCS5A03G0677100;TraesCS5A03G0677200;TraesCS5B03G0715700;TraesCS5B03G1312700;TraesCS5D03G0648100;TraesCS5D03G0648700;TraesCS6A03G0000400;TraesCS7A03G1032000;TraesCS7B03G0232400;TraesCS7B03G0794000	K00276+K00276+K00276+K00276+K01079+K00827+K00276+K00306+K00306+K00306+K00928+K00306+K00306+K15893+K00499+K01834+K06001
	Various types of N-glycan biosynthesis	ko00513	1	TraesCS3B03G1286400LC	K01230
	Protein export	ko03060	12	TraesCS1D03G0600900;TraesCS4A03G0496800;TraesCS4B03G0317000;TraesCS4D03G0259900;TraesCS5A03G0424900;TraesCS5A03G0905100;TraesCS5B03G0419800;TraesCS5B03G0956000;TraesCS5D03G0393200;TraesCS5D03G0867100;TraesCS6A03G0048200;TraesCS7B03G1214600	K10956+K09481+K09481+K09481+K09481+K03116+K09481+K03116+K09481+K03116+K09647+K03100
	Cysteine and methionine metabolism	ko00270	24	TraesCS1A03G0487700;TraesCS1B03G0584600;TraesCS2A03G0537200;TraesCS2B03G0328800;TraesCS2B03G0658900;TraesCS4A03G0747300;TraesCS4B03G0469500;TraesCS4B03G0643100;TraesCS4B03G0938300;TraesCS5A03G0595000;TraesCS5A03G1239900;TraesCS5B03G1109300;TraesCS5B03G1312700;TraesCS6A03G0601500;TraesCS6A03G0601600;TraesCS6A03G0841800;TraesCS6A03G0963100;TraesCS6B03G0732300;TraesCS6B03G0732400;TraesCS6B03G1178100…	K01761+K01761+K00558+K00815+K00558+K00641+K00827+K00826+K00826+K05933+K00826+K00826+K00928+K01611+K01611+K05933+K00558+K01611+K01611+K00558+K01611+K01611+K05933+K00558
	Alanine, aspartate and glutamate metabolism	ko00250	21	TraesCS1B03G1019800;TraesCS1D03G0849900;TraesCS2A03G1188200;TraesCS2B03G1350700;TraesCS2B03G1350800;TraesCS2D03G1140700;TraesCS3A03G0144100;TraesCS3B03G0185300;TraesCS3D03G0130300;TraesCS4A03G0020300;TraesCS4A03G0246000;TraesCS4B03G0101500;TraesCS4B03G0469500;TraesCS4B03G0632100;TraesCS4D03G0096100;TraesCS4D03G0481800;TraesCS4D03G0690600;TraesCS5D03G0389800;TraesCS6A03G0227300;TraesCS6A03G0782800…	K00294+K00294+K13051+K13051+K13051+K13051+K13051+K13051+K13051+K13566+K01755+K01915+K00827+K01580+K01580+K01953+K13566+K01953+K00278+K01915+K17761
	Base excision repair	ko03410	9	TraesCS1A03G0812200;TraesCS1A03G0840800;TraesCS1A03G0991900;TraesCS1B03G0966700;TraesCS1B03G1174500;TraesCS1D03G0809400;TraesCS2B03G1455800;TraesCS6D03G0732000;TraesCS7D03G1201900	K10798+K03505+K01247+K03505+K01247+K03505+K03648+K10773+K10563
	Proteasome	ko03050	2	TraesCS1D03G0575400;TraesCS5B03G1208000LC	K03030+K02730
	Arginine and proline metabolism	ko00330	21	TraesCS1A03G0552200;TraesCS1B03G0644100;TraesCS1B03G1019800;TraesCS1B03G1202000;TraesCS1D03G0532400;TraesCS1D03G0849900;TraesCS1D03G0980000;TraesCS2B03G1445600;TraesCS2D03G0647600LC;TraesCS2D03G1218200;TraesCS3D03G0793300;TraesCS4A03G0174000;TraesCS4D03G0070300;TraesCS5A03G0900400;TraesCS6A03G0601500;TraesCS6A03G0601600;TraesCS6B03G0732300;TraesCS6B03G0732400;TraesCS6B03G1265100;TraesCS6D03G05051…	K00318+K00318+K00294+K01426+K00318+K00294+K01426+K17839+K01426+K17839+K12657+K01426+K01426+K00819+K01611+K01611+K01611+K01611+K00472+K01611+K01611
	Citrate cycle (TCA cycle)	ko00020	3	TraesCS3B03G1403100LC;TraesCS7B03G0271100;TraesCS7D03G0446000	K00627+K00161+K00161
	Steroid biosynthesis	ko00100	3	TraesCS3A03G0320700;TraesCS4D03G0183200;TraesCS5A03G1180300	K09832+K14423+K14423
	Pyruvate metabolism	ko00620	15	TraesCS2A03G0965100LC;TraesCS2D03G0788500;TraesCS3A03G0316700;TraesCS3A03G0696300;TraesCS3B03G0473700LC;TraesCS3B03G1403100LC;TraesCS4B03G0532000;TraesCS5A03G1073800;TraesCS5B03G1138700;TraesCS5D03G0254600LC;TraesCS5D03G1028500;TraesCS6B03G0061000LC;TraesCS6B03G0424800LC;TraesCS7B03G0271100;TraesCS7D03G0446000	K00051+K01638+K01595+K00029+K00102+K00627+K01595+K01759+K01759+K00873+K01759+K11262+K00102+K00161+K00161
	Biosynthesis of amino acids	ko01230	50	TraesCS1A03G0504600;TraesCS1A03G0778700;TraesCS1A03G0803800;TraesCS1B03G0371700LC;TraesCS1B03G0404700LC;TraesCS1B03G0576300;TraesCS1B03G0925400;TraesCS1B03G0974500;TraesCS1D03G0483400;TraesCS1D03G0772600;TraesCS1D03G0815700;TraesCS2A03G0675100LC;TraesCS2B03G0044200;TraesCS2B03G0756300LC;TraesCS2B03G0895500;TraesCS2B03G1526400;TraesCS3A03G1239300LC;TraesCS3B03G0956400LC;TraesCS3D03G0164300;TraesCS…	K05359+K00927+K14152+K18649+K00800+K05359+K14152+K00850+K05359+K14152+K00850+K01807+K00611+K01807+K01658+K00052+K01079+K10206+K00891+K12657+K01755+K00641+K01915+K00826+K00826+K01953+K05359+K05359+K00826+K01609+K05359+K00850+K00826+K00928+K00873+K01953+K05359+K01704+K01915+K00611+K01653+K00611+K01704+K00611+K01834+K06001+K01803+K01803+K00053+K01803
	Galactose metabolism	ko00052	26	TraesCS1B03G0974500;TraesCS1D03G0815700;TraesCS1D03G1042500;TraesCS2A03G0013700;TraesCS2A03G0391700;TraesCS2A03G0642200LC;TraesCS2B03G1488800;TraesCS2D03G0416500;TraesCS2D03G0651800LC;TraesCS2D03G0909100;TraesCS3A03G0533500;TraesCS3B03G0286700;TraesCS3B03G0317200;TraesCS3B03G0615500;TraesCS3B03G0619400LC;TraesCS3D03G0221000;TraesCS3D03G0241700;TraesCS3D03G0496500;TraesCS4B03G0260400LC;TraesCS4B03…	K00850+K00850+K01784+K00844+K12309+K06617+K01193+K12309+K12447+K12309+K12309+K12309+K06617+K12309+K12309+K12309+K06617+K12309+K00963+K12309+K18819+K00850+K07407+K06617+K06617+K06617
	Ether lipid metabolism	ko00565	4	TraesCS2A03G1107600;TraesCS2D03G1331600;TraesCS4B03G0094500;TraesCS5D03G1145000	K01047+K01115+K01047+K01115
	Circadian rhythm - plant	ko04712	60	TraesCS1A03G0201700;TraesCS1B03G0270100;TraesCS1B03G0951500;TraesCS1D03G0192500;TraesCS1D03G0796200;TraesCS2A03G0207000;TraesCS2A03G1078800;TraesCS2B03G0222600;TraesCS2B03G0222800;TraesCS2B03G0284400;TraesCS2B03G1209500;TraesCS2D03G0156800;TraesCS2D03G0211700;TraesCS2D03G1021500;TraesCS3A03G0331600;TraesCS3A03G0430300;TraesCS3A03G0734000;TraesCS3B03G0387400;TraesCS3B03G0508900;TraesCS3D03G0274100…	K12126+K12126+K16222+K12126+K16222+K16222+K12133+K12129+K12129+K16222+K12133+K12129+K16222+K12133+K16223+K16222+K16222+K16223+K16222+K16241+K16223+K16222+K12120+K12135+K16222+K16221+K12129+K16222+K12135+K12126+K12130+K12126+K12130+K16221+K12126+K12130+K12127+K12133+K12133+K12133+K12133+K12135+K12126+K16221+K12127+K12133+K12135+K12126+K12133+K12135+K12133+K12133+K12133+K12133+K12133+K16223+K12133+…
	Fatty acid degradation	ko00071	8	TraesCS1D03G0178000;TraesCS1D03G0826400;TraesCS3B03G0227800;TraesCS4A03G0540100;TraesCS4A03G0540300;TraesCS4B03G0798400;TraesCS4D03G0203800;TraesCS7D03G0321800	K01897+K07517+K20495+K18857+K18857+K00121+K18857+K00232
	Nucleotide excision repair	ko03420	24	TraesCS1A03G0206300;TraesCS1A03G0209900;TraesCS1A03G0840800;TraesCS1B03G0966700;TraesCS1D03G0199500;TraesCS1D03G0203400;TraesCS1D03G0809400;TraesCS3A03G0336800;TraesCS3B03G0002800;TraesCS3B03G0162900LC;TraesCS3B03G0495200;TraesCS3D03G0388500;TraesCS4A03G0003500LC;TraesCS4A03G0602300;TraesCS4B03G0204500;TraesCS4D03G0167600;TraesCS7A03G0312600;TraesCS7A03G0789200;TraesCS7B03G0626400;TraesCS7B03G108…	K07466+K06634+K03505+K03505+K07466+K06634+K03505+K07466+K03868+K07466+K10740+K10740+K07466+K10756+K10756+K10756+K10842+K10839+K10839+K10839+K10842+K07466+K10839+K10839
	Homologous recombination	ko03440	34	TraesCS1A03G0089000;TraesCS1A03G0206300;TraesCS1A03G0840800;TraesCS1B03G0325900;TraesCS1B03G0966700;TraesCS1D03G0199500;TraesCS1D03G0809400;TraesCS2A03G0374300;TraesCS2B03G0499100;TraesCS2D03G0394000;TraesCS2D03G0451500;TraesCS2D03G0877500;TraesCS3A03G0336800;TraesCS3B03G0162900LC;TraesCS3B03G0495200;TraesCS3B03G0975100;TraesCS3D03G0176500;TraesCS3D03G0388500;TraesCS3D03G0779900;TraesCS4A03G00035…	K12173+K07466+K03505+K12173+K03505+K07466+K03505+K12173+K12173+K12173+K10870+K10728+K07466+K07466+K10740+K12173+K08775+K10740+K12173+K07466+K12173+K12173+K12173+K12173+K12173+K12173+K12173+K12173+K12173+K12173+K12173+K07466+K12173+K10875
	Mannose type O-glycan biosynthesis	ko00515	2	TraesCS3A03G0046600;TraesCS3B03G0051000	K18207+K18207
	Autophagy - other	ko04136	3	TraesCS2D03G0513200;TraesCS3B03G1114900;TraesCS4D03G0220200	K08341+K08343+K08331
	Glycerolipid metabolism	ko00561	29	TraesCS1A03G0610900;TraesCS1A03G0712400;TraesCS1A03G0905600;TraesCS1B03G0702400;TraesCS1D03G0307200;TraesCS1D03G0578600;TraesCS2A03G0886500;TraesCS2B03G0818200;TraesCS2B03G0976700;TraesCS2D03G0825100;TraesCS3A03G0832100;TraesCS3B03G0953000;TraesCS3D03G0763300;TraesCS4A03G0192600;TraesCS4A03G0684900;TraesCS4B03G0095100;TraesCS4B03G0111000;TraesCS4D03G0069000;TraesCS4D03G0094300;TraesCS5B03G0444100…	K00901+K00002+K18693+K00901+K11155+K00901+K00679+K09480+K00679+K00679+K00679+K00679+K00679+K09480+K01054+K21362+K01054+K21362+K01054+K01054+K01054+K07407+K22848+K24189+K00679+K00679+K22848+K00002+K21362
	Protein processing in endoplasmic reticulum	ko04141	29	TraesCS1B03G0791600;TraesCS1B03G0819700;TraesCS1D03G0600900;TraesCS1D03G0681600;TraesCS2A03G0680700;TraesCS2D03G0481700;TraesCS3B03G0002800;TraesCS3B03G0554700;TraesCS3B03G0584800;TraesCS3B03G1286400LC;TraesCS4A03G0482800LC;TraesCS4A03G0496800;TraesCS4B03G0317000;TraesCS4B03G0571100;TraesCS4B03G0573700;TraesCS4D03G0044100;TraesCS4D03G0259900;TraesCS4D03G0283400;TraesCS4D03G0507200;TraesCS5A03G042…	K03283+K10575+K10956+K10575+K01456+K13993+K03868+K09518+K14016+K01230+K16196+K09481+K09481+K03283+K03283+K09486+K09481+K03283+K03283+K09481+K09481+K09481+K13989+K09523+K10839+K10839+K10839+K10839+K10839
	Glyoxylate and dicarboxylate metabolism	ko00630	16	TraesCS2A03G0132200;TraesCS2B03G0178600;TraesCS2B03G0179200;TraesCS2D03G0128700;TraesCS2D03G0129300;TraesCS2D03G0788500;TraesCS2D03G1278500;TraesCS4B03G0101500;TraesCS5A03G0659200;TraesCS5D03G0628800;TraesCS6A03G0000400;TraesCS6A03G0093800;TraesCS6A03G0782800;TraesCS6B03G0133900;TraesCS6B03G0727700LC;TraesCS6D03G0101500	K01602+K01602+K01602+K01602+K01602+K01638+K22133+K01915+K11517+K11517+K15893+K03781+K01915+K03781+K19269+K03781
	Biosynthesis of unsaturated fatty acids	ko01040	3	TraesCS4D03G0523700;TraesCS5A03G0599200;TraesCS7D03G0321800	K10251+K03921+K00232
	Pyrimidine metabolism	ko00240	12	TraesCS1A03G0138300;TraesCS1A03G1005700;TraesCS1B03G0187500;TraesCS1D03G0125400;TraesCS1D03G0675300;TraesCS2A03G0680300;TraesCS3B03G0371300;TraesCS3B03G0690200;TraesCS3D03G0290600;TraesCS5A03G0036800;TraesCS5B03G0029500;TraesCS5D03G0047500	K01240+K01937+K01240+K01240+K00761+K16904+K13800+K01937+K13800+K01520+K01520+K01520
	Flavonoid biosynthesis	ko00941	8	TraesCS1B03G0958700;TraesCS2B03G0188400;TraesCS2D03G1078400;TraesCS3B03G0803700;TraesCS3D03G0647000;TraesCS5A03G0920200;TraesCS5B03G0971900;TraesCSU03G0448300LC	K22845+K22845+K08695+K22845+K22845+K13065+K13065+K22845
	Fructose and mannose metabolism	ko00051	17	TraesCS1B03G0974500;TraesCS1D03G0815700;TraesCS2A03G0013700;TraesCS3A03G0619900;TraesCS3A03G0938200;TraesCS3B03G0790300;TraesCS3B03G1018200;TraesCS3D03G0631200;TraesCS3D03G0870400;TraesCS5B03G1060800;TraesCS6D03G0755500;TraesCS7A03G0626400;TraesCS7B03G0028200LC;TraesCS7B03G1192800;TraesCS7B03G1193100;TraesCS7D03G0609400;TraesCS7D03G1211600	K00850+K00850+K00844+K19355+K00847+K19355+K03841+K19355+K00847+K00850+K02377+K00008+K01809+K01803+K01803+K00008+K01803
	Peroxisome	ko04146	24	TraesCS1A03G0494500;TraesCS1D03G0178000;TraesCS2B03G1397000;TraesCS2D03G0373700LC;TraesCS3A03G1019800;TraesCS3A03G1020000;TraesCS3B03G0497800;TraesCS3B03G0535500;TraesCS5A03G0659200;TraesCS5A03G0677100;TraesCS5A03G0677200;TraesCS5A03G0873200;TraesCS5A03G1240000;TraesCS5B03G0715700;TraesCS5D03G0482300LC;TraesCS5D03G0628800;TraesCS5D03G0648100;TraesCS5D03G0648700;TraesCS6A03G0093800;TraesCS6B03G013…	K00106+K01897+K08726+K13346+K12663+K12663+K08726+K01640+K11517+K00306+K00306+K04564+K13356+K00306+K13356+K11517+K00306+K00306+K03781+K03781+K03781+K13356+K08726+K00232
	Spliceosome	ko03040	38	TraesCS1A03G0597400;TraesCS1B03G0531100;TraesCS1B03G0693100;TraesCS1B03G0791600;TraesCS1B03G1168800;TraesCS1D03G0410600;TraesCS1D03G0569500;TraesCS2D03G0588000;TraesCS2D03G0654900;TraesCS3A03G0459200;TraesCS3B03G0308900;TraesCS3B03G0518600;TraesCS3B03G1017600;TraesCS3D03G1116300;TraesCS4A03G0486500;TraesCS4A03G1192700;TraesCS4B03G0187200;TraesCS4B03G0314600;TraesCS4B03G0408900;TraesCS4B03G0571100…	K12890+K12859+K12890+K03283+K11094+K12859+K12890+K12844+K11094+K12818+K12818+K12818+K12859+K12741+K12881+K12863+K12821+K12823+K12900+K03283+K03283+K12897+K12818+K12823+K03283+K03283+K12897+K13025+K12881+K12843+K12881+K12741+K12846+K12818+K12846+K12846+K12836+K12847
	Zeatin biosynthesis	ko00908	13	TraesCS1B03G0521500;TraesCS1D03G0405900;TraesCS2A03G0262500;TraesCS2B03G1092800;TraesCS2B03G1223200LC;TraesCS2D03G0854000;TraesCS3A03G0298400;TraesCS3A03G0763900;TraesCS3D03G0303900;TraesCS3D03G0705800;TraesCS5A03G0771400;TraesCS5D03G0731700;TraesCS7B03G0837700	K00279+K00279+K13495+K13495+K13496+K23452+K00279+K00279+K00279+K00279+K23452+K23452+K23452
	Mismatch repair	ko03430	15	TraesCS1A03G0206300;TraesCS1A03G0840800;TraesCS1B03G0966700;TraesCS1D03G0199500;TraesCS1D03G0809400;TraesCS3A03G0336800;TraesCS3B03G0162900LC;TraesCS3B03G0495200;TraesCS3D03G0388500;TraesCS4A03G0003500LC;TraesCS4A03G0602300;TraesCS4B03G0204500;TraesCS4D03G0167600;TraesCS7B03G0680700;TraesCS7D03G0633300LC	K07466+K03505+K03505+K07466+K03505+K07466+K07466+K10740+K10740+K07466+K10756+K10756+K10756+K10746+K07466
	Lysine degradation	ko00310	7	TraesCS1D03G0421200;TraesCS5A03G0677100;TraesCS5A03G0677200;TraesCS5B03G0715700;TraesCS5D03G0648100;TraesCS5D03G0648700;TraesCS7D03G0286600	K11426+K00306+K00306+K00306+K00306+K00306+K11430
	Phenylpropanoid biosynthesis	ko00940	52	TraesCS1A03G0535100;TraesCS1A03G0704200;TraesCS1A03G0791400;TraesCS1B03G0108400;TraesCS1B03G0612700;TraesCS1B03G0803600;TraesCS1B03G0907900;TraesCS1D03G0516200;TraesCS1D03G0668900;TraesCS1D03G0756600;TraesCS1D03G0979900;TraesCS2A03G0815300;TraesCS2A03G0917500;TraesCS2A03G1251200;TraesCS2A03G1334700;TraesCS2A03G1337300;TraesCS2B03G0060700;TraesCS2D03G0161500;TraesCS3A03G1065800;TraesCS3D03G0547100…	K00430+K05349+K23260+K10775+K09753+K05349+K00430+K00430+K05349+K00430+K09753+K00430+K18368+K22395+K00430+K00430+K23260+K00430+K01188+K09753+K00430+K00430+K01188+K09753+K00430+K13065+K09753+K00083+K09753+K09753+K13065+K09753+K09753+K09753+K09753+K01188+K00430+K13066+K00430+K00430+K13066+K00430+K01188+K00430+K01188+K09753+K00430+K09753+K01188+K01188+K00430+K00430
	Other types of O-glycan biosynthesis	ko00514	5	TraesCS2A03G1031400;TraesCS2B03G1152500;TraesCS2D03G0216900;TraesCS2D03G0970500;TraesCS3B03G0524400	K20781+K20781+K20784+K20781+K20782
	Synthesis and degradation of ketone bodies	ko00072	1	TraesCS3B03G0535500	K01640
	Selenocompound metabolism	ko00450	2	TraesCS1A03G0487700;TraesCS1B03G0584600	K01761+K01761
	Taurine and hypotaurine metabolism	ko00430	2	TraesCS4B03G0632100;TraesCS4D03G0096100	K01580+K01580
	Glycosphingolipid biosynthesis - ganglio series	ko00604	10	TraesCS2A03G0391700;TraesCS2D03G0416500;TraesCS2D03G0909100;TraesCS3A03G0533500;TraesCS3B03G0286700;TraesCS3B03G0615500;TraesCS3B03G0619400LC;TraesCS3D03G0221000;TraesCS3D03G0496500;TraesCS4B03G0630500	K12309+K12309+K12309+K12309+K12309+K12309+K12309+K12309+K12309+K12309
	Carotenoid biosynthesis	ko00906	12	TraesCS4A03G0236300;TraesCS4B03G0305100;TraesCS4D03G0640300;TraesCS5A03G0898000;TraesCS5B03G0902000;TraesCS5B03G0943700;TraesCS5D03G0859900;TraesCS5D03G1169300;TraesCS6A03G0987200;TraesCS6B03G0858400;TraesCS6D03G0607800;TraesCS7A03G1236900	K09841+K09838+K09838+K09840+K02291+K09840+K09840+K09841+K15747+K09843+K09843+K09842
	N-Glycan biosynthesis	ko00510	4	TraesCS3B03G1286400LC;TraesCS4A03G0223800;TraesCS4A03G0481500;TraesCS6A03G0575700	K01230+K07252+K00729+K00737
	Phenylalanine, tyrosine and tryptophan biosynthesis	ko00400	13	TraesCS1A03G0504600;TraesCS1B03G0404700LC;TraesCS1B03G0576300;TraesCS1D03G0483400;TraesCS2B03G0328800;TraesCS2B03G0895500;TraesCS3D03G0164300;TraesCS4D03G0487700;TraesCS5A03G0890700;TraesCS5B03G0449300;TraesCS5B03G0937900;TraesCS5D03G0852600;TraesCS7B03G0794000	K05359+K00800+K05359+K05359+K00815+K01658+K00891+K05359+K05359+K01609+K05359+K05359+K06001
	MAPK signaling pathway - plant	ko04016	66	TraesCS1A03G0248200;TraesCS1A03G0765700;TraesCS1A03G0875600;TraesCS1B03G0779800;TraesCS1D03G0405800;TraesCS1D03G0851600;TraesCS1D03G0975200;TraesCS2A03G0179800;TraesCS2A03G0205300;TraesCS2A03G0614300;TraesCS2A03G1063400;TraesCS2A03G1348400;TraesCS2B03G0281300;TraesCS2D03G0000400;TraesCS2D03G0937000;TraesCS2D03G1101100;TraesCS2D03G1320900;TraesCS3A03G0056400;TraesCS3A03G0252800;TraesCS3A03G0395200…	K13422+K02183+K14497+K14498+K13416+K14497+K20538+K14496+K14514+K13413+K20558+K14498+K14514+K14497+K13416+K14498+K14498+K13422+K13424+K14509+K14497+K02183+K14497+K14497+K13447+K14497+K13416+K13416+K13422+K14497+K14497+K14497+K14497+K14514+K13449+K13414+K13414+K13420+K13449+K14497+K02183+K13422+K13449+K14497+K14497+K13425+K14497+K14497+K03781+K13447+K20558+K20558+K13449+K13413+K03781+K03781+K13420+…
	Fatty acid metabolism	ko01212	12	TraesCS1D03G0178000;TraesCS1D03G0896600;TraesCS2A03G0926800;TraesCS2B03G1018900;TraesCS2D03G0866400;TraesCS4D03G0523700;TraesCS5A03G0599200;TraesCS5B03G0976900;TraesCS5D03G0886000;TraesCS6B03G0061000LC;TraesCS7A03G0567900;TraesCS7D03G0321800	K01897+K00059+K02372+K02372+K02372+K10251+K03921+K00059+K00059+K11262+K00059+K00232
	SNARE interactions in vesicular transport	ko04130	3	TraesCS6A03G0202500;TraesCS6B03G0270500;TraesCS7D03G0305400	K08495+K08495+K08515
	Caffeine metabolism	ko00232	2	TraesCS1A03G0494500;TraesCS3A03G0888400	K00106+K00365
	RNA degradation	ko03018	12	TraesCS1B03G0974500;TraesCS1D03G0815700;TraesCS3A03G0229500;TraesCS4B03G0504200;TraesCS5A03G0210700LC;TraesCS5A03G0464900;TraesCS5B03G0460200;TraesCS5B03G1060800;TraesCS5D03G0429800;TraesCS5D03G1218300;TraesCS6B03G1279700LC;TraesCS7A03G0274200	K00850+K00850+K04077+K12608+K12605+K13126+K13126+K00850+K13126+K12590+K12616+K12592
	Tryptophan metabolism	ko00380	18	TraesCS1B03G1202000;TraesCS1D03G0581100;TraesCS1D03G0980000;TraesCS2A03G0024200;TraesCS2B03G0030700;TraesCS2D03G0647600LC;TraesCS3A03G0213000;TraesCS3A03G0690000;TraesCS3B03G0255800;TraesCS3D03G0193300;TraesCS4A03G0174000;TraesCS4A03G0759500LC;TraesCS4D03G0070300;TraesCS6A03G0093800;TraesCS6B03G0133900;TraesCS6D03G0101500;TraesCS7D03G0120600;TraesCS7D03G0136300	K01426+K16903+K01426+K11816+K11816+K01426+K11816+K16903+K11816+K11816+K01426+K11816+K01426+K03781+K03781+K03781+K01593+K11816
	Pentose phosphate pathway	ko00030	7	TraesCS1B03G0974500;TraesCS1D03G0815700;TraesCS2A03G0675100LC;TraesCS2B03G0756300LC;TraesCS3B03G1018200;TraesCS5B03G1060800;TraesCS6B03G0714100	K00850+K00850+K01807+K01807+K03841+K00850+K00036
	Phosphatidylinositol signaling system	ko04070	28	TraesCS1A03G0610900;TraesCS1A03G0765700;TraesCS1B03G0371700LC;TraesCS1B03G0702400;TraesCS1D03G0023900;TraesCS1D03G0164800;TraesCS1D03G0578600;TraesCS2A03G0236200;TraesCS2D03G0405200;TraesCS3A03G0249800;TraesCS3A03G0628400;TraesCS3A03G0801400;TraesCS3B03G0318800;TraesCS3B03G0714000;TraesCS3D03G0243600;TraesCS4A03G0703600;TraesCS4B03G0091100;TraesCS4B03G0791300;TraesCS5B03G0536200;TraesCS5D03G03477…	K00901+K02183+K18649+K00901+K00889+K05857+K00901+K18081+K05857+K01106+K20279+K02183+K01106+K20279+K01106+K00889+K00889+K02183+K01099+K18081+K01092+K01092+K01092+K01092+K01092+K00889+K00913+K02183
	Tyrosine metabolism	ko00350	11	TraesCS2A03G0826800;TraesCS2B03G0210000;TraesCS2B03G0328800;TraesCS2B03G0913900;TraesCS2D03G0146700;TraesCS4A03G0540100;TraesCS4A03G0540300;TraesCS4B03G0619700;TraesCS4B03G0798400;TraesCS4D03G0203800;TraesCS7D03G0120600	K00276+K00276+K00815+K00276+K00276+K18857+K18857+K00276+K00121+K18857+K01593
	Riboflavin metabolism	ko00740	4	TraesCS2B03G0982100;TraesCS4A03G0148700;TraesCS4D03G0558200;TraesCS7B03G0683300	K14379+K14379+K14379+K20884
	Arginine biosynthesis	ko00220	8	TraesCS2B03G0044200;TraesCS4A03G0246000;TraesCS4B03G0101500;TraesCS5B03G1207600;TraesCS6A03G0782800;TraesCS6A03G0987300;TraesCS6B03G1210400;TraesCS6D03G0872600	K00611+K01755+K01915+K01427+K01915+K00611+K00611+K00611
	Thiamine metabolism	ko00730	7	TraesCS2B03G0301100;TraesCS2D03G1218600;TraesCS5B03G0490900;TraesCS5D03G0454100;TraesCS7A03G0776300;TraesCS7B03G0633500;TraesCSU03G0022100	K00949+K00939+K04487+K04487+K00939+K00939+K22911
	Isoflavonoid biosynthesis	ko00943	10	TraesCS2A03G1066800;TraesCS4A03G0002000;TraesCS4B03G0002000;TraesCS4D03G0001800;TraesCS5B03G0998600;TraesCS5D03G0904600;TraesCS5D03G0904700;TraesCS6B03G1099900;TraesCS6B03G1224500;TraesCS6D03G0881000	K13264+K13264+K13264+K13264+K13260+K13260+K13260+K13264+K13264+K13264
	Ascorbate and aldarate metabolism	ko00053	15	TraesCS1B03G0371700LC;TraesCS2A03G1331800;TraesCS2D03G0651800LC;TraesCS3B03G1051100;TraesCS3D03G0858800;TraesCS6A03G0729000;TraesCS6B03G0225100LC;TraesCS6B03G0225700;TraesCS7A03G0444600;TraesCS7A03G0874200;TraesCS7B03G0253000;TraesCS7B03G0728600;TraesCS7D03G0429000;TraesCS7D03G0625600;TraesCS7D03G0860400	K18649+K00423+K12447+K14190+K14190+K08232+K16190+K16190+K21888+K00469+K21888+K00423+K21888+K08232+K00469
	Glucosinolate biosynthesis	ko00966	4	TraesCS4B03G0643100;TraesCS4B03G0938300;TraesCS5A03G1239900;TraesCS5B03G1109300	K00826+K00826+K00826+K00826
	Valine, leucine and isoleucine biosynthesis	ko00290	9	TraesCS2B03G1526400;TraesCS4B03G0643100;TraesCS4B03G0938300;TraesCS5A03G1239900;TraesCS5B03G1109300;TraesCS6A03G0664500;TraesCS6B03G0729400;TraesCS6D03G0553100;TraesCS7D03G0226400LC	K00052+K00826+K00826+K00826+K00826+K01704+K01653+K01704+K00053
	Carbon metabolism	ko01200	41	TraesCS1A03G0778700;TraesCS1B03G0974500;TraesCS1D03G0815700;TraesCS2A03G0013700;TraesCS2A03G0132200;TraesCS2A03G0675100LC;TraesCS2A03G0965100LC;TraesCS2B03G0178600;TraesCS2B03G0179200;TraesCS2B03G0756300LC;TraesCS2D03G0128700;TraesCS2D03G0129300;TraesCS2D03G0788500;TraesCS3A03G0316700;TraesCS3A03G0696300;TraesCS3A03G0786300;TraesCS3A03G0871600;TraesCS3A03G1239300LC;TraesCS3B03G1018200;TraesCS3B03…	K00927+K00850+K00850+K00844+K01602+K01807+K00051+K01602+K01602+K01807+K01602+K01602+K01638+K01595+K00029+K00074+K01100+K01079+K03841+K00627+K05605+K01100+K01595+K00121+K11517+K00850+K00873+K11517+K15893+K03781+K03781+K00036+K19269+K03781+K01834+K00161+K01803+K01803+K00232+K00161+K01803
	Glycosphingolipid biosynthesis - globo and isoglobo series	ko00603	1	TraesCS6A03G0796300	K07407
	Sulfur relay system	ko04122	5	TraesCS5A03G0505400;TraesCS5B03G0490900;TraesCS5B03G0508500;TraesCS5D03G0454100;TraesCS5D03G0471900	K03635+K04487+K03635+K04487+K03635
	Flavone and flavonol biosynthesis	ko00944	7	TraesCS2A03G1066800;TraesCS4A03G0002000;TraesCS4B03G0002000;TraesCS4D03G0001800;TraesCS6B03G1099900;TraesCS6B03G1224500;TraesCS6D03G0881000	K13264+K13264+K13264+K13264+K13264+K13264+K13264
	C5-Branched dibasic acid metabolism	ko00660	4	TraesCS2B03G1526400;TraesCS6A03G0664500;TraesCS6B03G0729400;TraesCS6D03G0553100	K00052+K01704+K01653+K01704
	Carbon fixation in photosynthetic organisms	ko00710	18	TraesCS1A03G0778700;TraesCS2A03G0132200;TraesCS2A03G0675100LC;TraesCS2A03G0965100LC;TraesCS2B03G0178600;TraesCS2B03G0179200;TraesCS2B03G0756300LC;TraesCS2D03G0128700;TraesCS2D03G0129300;TraesCS3A03G0316700;TraesCS3A03G0696300;TraesCS3A03G0871600;TraesCS3B03G1018200;TraesCS3D03G0797700;TraesCS4B03G0532000;TraesCS7B03G1192800;TraesCS7B03G1193100;TraesCS7D03G1211600	K00927+K01602+K01807+K00051+K01602+K01602+K01807+K01602+K01602+K01595+K00029+K01100+K03841+K01100+K01595+K01803+K01803+K01803
	Oxidative phosphorylation	ko00190	25	TraesCS1A03G0691200;TraesCS1A03G0810700;TraesCS1B03G1188600LC;TraesCS1D03G0655000;TraesCS2A03G0574200;TraesCS2A03G1328200;TraesCS2B03G0617900;TraesCS3A03G0569400;TraesCS3B03G0415400;TraesCS3D03G0330000;TraesCS3D03G0527600;TraesCS3D03G0661600;TraesCS4A03G0652000;TraesCS4B03G0110100;TraesCS4B03G0147600;TraesCS4D03G0124900;TraesCS5B03G1015300;TraesCS5D03G0918900;TraesCS7A03G0424200;TraesCS7A03G09899…	K01507+K03943+K01507+K01507+K02134+K01507+K02134+K02265+K02150+K02150+K02265+K03940+K02113+K02258+K02113+K02113+K02266+K02266+K03955+K02150+K03955+K02265+K03955+K00412+K02132
	Endocytosis	ko04144	24	TraesCS1B03G0297500LC;TraesCS1B03G0791600;TraesCS1D03G0023900;TraesCS2D03G1331600;TraesCS3A03G0180600;TraesCS4A03G0172400;TraesCS4A03G0703600;TraesCS4B03G0091100;TraesCS4B03G0571100;TraesCS4B03G0573700;TraesCS4B03G0623600;TraesCS4D03G0283400;TraesCS4D03G0507200;TraesCS4D03G0553500;TraesCS5A03G0958800;TraesCS5B03G1008500;TraesCS5D03G0726500;TraesCS5D03G0913900;TraesCS5D03G1075900;TraesCS5D03G11450…	K19475+K03283+K00889+K01115+K12198+K19476+K00889+K00889+K03283+K03283+K19366+K03283+K03283+K19366+K12189+K12189+K07904+K12189+K07901+K01115+K00889+K07937+K05756+K23612
	Inositol phosphate metabolism	ko00562	27	TraesCS1B03G0371700LC;TraesCS1D03G0023900;TraesCS1D03G0164800;TraesCS2A03G0236200;TraesCS2D03G0405200;TraesCS3A03G0249800;TraesCS3A03G0628400;TraesCS3B03G0318800;TraesCS3B03G0714000;TraesCS3D03G0243600;TraesCS4A03G0703600;TraesCS4B03G0091100;TraesCS5B03G0536200;TraesCS5B03G1183600;TraesCS5D03G0347700;TraesCS6A03G0820000;TraesCS6B03G0919500;TraesCS6B03G0971300;TraesCS6D03G0654600;TraesCS6D03G06934…	K18649+K00889+K05857+K18081+K05857+K01106+K20279+K01106+K20279+K01106+K00889+K00889+K01099+K03103+K18081+K01092+K01092+K01092+K01092+K01092+K00889+K00913+K00469+K01803+K01803+K00469+K01803
	Nitrogen metabolism	ko00910	7	TraesCS1B03G0505400LC;TraesCS3B03G0675200;TraesCS3D03G0548000;TraesCS4B03G0101500;TraesCS6A03G0782800;TraesCS7A03G1309200;TraesCS7D03G0143600LC	K01674+K01673+K01673+K01915+K01915+K01674+K01674
	Plant-pathogen interaction	ko04626	105	TraesCS1A03G0343000;TraesCS1A03G0765700;TraesCS1B03G0001400LC;TraesCS1B03G0102400;TraesCS1B03G0102500LC;TraesCS1B03G0235700;TraesCS1B03G1181300;TraesCS1D03G0073400;TraesCS1D03G0300000;TraesCS1D03G0405800;TraesCS1D03G0555000;TraesCS1D03G0607300;TraesCS2A03G0002600;TraesCS2A03G0614300;TraesCS2B03G0162400;TraesCS2B03G0858600;TraesCS2D03G0610800;TraesCS2D03G0664400LC;TraesCS2D03G0930300;TraesCS2D03G0…	K13448+K02183+K13457+K13457+K13457+K13430+K13457+K13457+K13448+K13416+K13430+K13457+K13459+K13413+K13466+K13457+K13457+K02358+K13458+K13416+K13448+K13430+K13424+K13435+K02183+K13430+K13412+K13447+K18878+K13416+K13457+K13457+K13416+K13448+K13430+K12795+K13459+K13449+K13414+K13457+K13414+K13420+K13449+K16225+K15397+K13430+K13449+K13457+K13430+K15397+K13435+K13425+K13412+K13457+K15397+K13457+K13434+…
	Betalain biosynthesis	ko00965	9	TraesCS3D03G0841500;TraesCS4B03G0110000;TraesCS5A03G0397100;TraesCS5A03G0580700;TraesCS5B03G0594900;TraesCS5D03G0544700;TraesCS5D03G0545100;TraesCS6D03G0612100;TraesCS7D03G0120600	K15777+K15777+K15777+K15777+K15777+K15777+K15777+K15777+K01593
	Amino sugar and nucleotide sugar metabolism	ko00520	21	TraesCS1A03G0764500;TraesCS1A03G0782200;TraesCS1D03G1042500;TraesCS2A03G0013700;TraesCS2D03G0234900;TraesCS2D03G0651800LC;TraesCS3A03G0296600LC;TraesCS3A03G0938200;TraesCS3D03G0286600;TraesCS3D03G0684200;TraesCS3D03G0870400;TraesCS4B03G0260400LC;TraesCS4B03G0299100;TraesCS5B03G0726500;TraesCS5B03G1180800;TraesCS6A03G0748800;TraesCS6B03G0225100LC;TraesCS6B03G0225700;TraesCS6D03G0632800;TraesCS6D03…	K00770+K12450+K01784+K00844+K08678+K12447+K01183+K00847+K01183+K13379+K00847+K00963+K15920+K08679+K00975+K00621+K16190+K16190+K00621+K02377+K01809
	Indole alkaloid biosynthesis	ko00901	2	TraesCS5B03G0519900;TraesCS5D03G0479100	K01757+K01757
	Cyanoamino acid metabolism	ko00460	19	TraesCS1A03G0704200;TraesCS1B03G0803600;TraesCS1D03G0668900;TraesCS2A03G1188200;TraesCS2B03G1350700;TraesCS2B03G1350800;TraesCS2D03G1140700;TraesCS3A03G0144100;TraesCS3A03G1065800;TraesCS3B03G0185300;TraesCS3D03G0130300;TraesCS5A03G0658400;TraesCS5D03G0672400;TraesCS5D03G0687600;TraesCS7A03G0566800;TraesCS7A03G1091300;TraesCS7B03G1079200;TraesCS7D03G0427900;TraesCS7D03G0548400	K05349+K05349+K05349+K13051+K13051+K13051+K13051+K13051+K01188+K13051+K13051+K01188+K13029+K01188+K01188+K01188+K08248+K01188+K01188
	Aminoacyl-tRNA biosynthesis	ko00970	9	TraesCS2A03G0515700LC;TraesCS2D03G1114500;TraesCS3B03G0220900;TraesCS3D03G0159200;TraesCS3D03G0665200;TraesCS4A03G0576700;TraesCS5D03G0853500;TraesCS6B03G0479400LC;TraesCSU03G0011400	K01893+K02433+K01870+K01870+K01870+K01870+K02435+K01870+K01870
	Ribosome biogenesis in eukaryotes	ko03008	14	TraesCS2A03G1014500;TraesCS2B03G0923600;TraesCS2D03G0954400;TraesCS3A03G0110600LC;TraesCS3A03G0763300;TraesCS3A03G0764800;TraesCS5B03G0056600;TraesCS5B03G0378800;TraesCS5B03G0383900;TraesCS6A03G0338100;TraesCS6D03G0294000;TraesCS7A03G1161600;TraesCS7D03G1108400;Triticum_aestivum_newGene_11434	K14574+K14555+K14574+K14536+K11128+K14570+K14536+K14559+K14559+K07178+K07178+K14563+K14563+K03538
	Ubiquitin mediated proteolysis	ko04120	45	TraesCS1A03G0100900;TraesCS1B03G0124900;TraesCS1B03G0819700;TraesCS1B03G1120700;TraesCS1B03G1205800;TraesCS1D03G0638400;TraesCS1D03G0681600;TraesCS1D03G0715700;TraesCS1D03G0745800;TraesCS2A03G0840300;TraesCS2A03G1077900;TraesCS2D03G0894100;TraesCS3A03G0056900;TraesCS3A03G0862900;TraesCS3B03G0002800;TraesCS3B03G0031800;TraesCS3B03G0064000;TraesCS3B03G0064900;TraesCS3B03G0120900;TraesCS3B03G0121700…	K04506+K04506+K10575+K10581+K03357+K03875+K10575+K10260+K08770+K03349+K10260+K10577+K04506+K10615+K03868+K04506+K04506+K04506+K04506+K04506+K10581+K10615+K04506+K04506+K06688+K04506+K02927+K02927+K10615+K10688+K10615+K10580+K02927+K10615+K10580+K04506+K03351+K10614+K04506+K03357+K10260+K10260+K10260+K04506+K04506
	2-Oxocarboxylic acid metabolism	ko01210	10	TraesCS2B03G1526400;TraesCS4B03G0643100;TraesCS4B03G0938300;TraesCS5A03G1239900;TraesCS5B03G1109300;TraesCS5B03G1312700;TraesCS6A03G0664500;TraesCS6B03G0729400;TraesCS6D03G0553100;TraesCS7D03G0226400LC	K00052+K00826+K00826+K00826+K00826+K00928+K01704+K01653+K01704+K00053
	Nicotinate and nicotinamide metabolism	ko00760	8	TraesCS1A03G0138300;TraesCS1B03G0187500;TraesCS1B03G0716900;TraesCS1D03G0125400;TraesCS2A03G0316200;TraesCS2D03G0331600;TraesCS5A03G0311800;TraesCS6A03G0227300	K01240+K01240+K00858+K01240+K18551+K18551+K11414+K00278
	Photosynthesis - antenna proteins	ko00196	18	TraesCS1A03G0761900;TraesCS1A03G0986900;TraesCS1A03G0988100;TraesCS1B03G1169100;TraesCS1B03G1170500;TraesCS1D03G0729600;TraesCS1D03G0954900;TraesCS2A03G0388400;TraesCS2B03G0532800;TraesCS2D03G0738900;TraesCS5A03G0584700;TraesCS5D03G0552200;TraesCS6B03G0305800;TraesCS6B03G0306000;TraesCS6D03G0175200;TraesCS7B03G0270500;TraesCS7B03G0466400LC;TraesCS7D03G0445500	K08912+K08912+K08912+K08912+K08912+K08912+K08912+K08908+K08908+K08917+K08910+K08910+K08912+K08912+K08912+K08912+K08912+K08912
	Tropane, piperidine and pyridine alkaloid biosynthesis	ko00960	6	TraesCS2A03G0826800;TraesCS2B03G0210000;TraesCS2B03G0328800;TraesCS2B03G0913900;TraesCS2D03G0146700;TraesCS4B03G0619700	K00276+K00276+K00815+K00276+K00276+K00276
	Glycosaminoglycan degradation	ko00531	14	TraesCS2A03G0391700;TraesCS2D03G0416500;TraesCS2D03G0909100;TraesCS3A03G0533500;TraesCS3B03G0286700;TraesCS3B03G0615500;TraesCS3B03G0619400LC;TraesCS3D03G0221000;TraesCS3D03G0496500;TraesCS3D03G0969300;TraesCS4B03G0630500;TraesCS5A03G0187900;TraesCS5B03G0199600;TraesCS7A03G0331700	K12309+K12309+K12309+K12309+K12309+K12309+K12309+K12309+K12309+K10532+K12309+K07964+K07964+K07964
	Pentose and glucuronate interconversions	ko00040	28	TraesCS1A03G0712400;TraesCS2B03G0737200;TraesCS2D03G0210900;TraesCS2D03G0651800LC;TraesCS3A03G0955100LC;TraesCS3B03G0497300;TraesCS3B03G0672700;TraesCS3D03G0043100LC;TraesCS4B03G0260400LC;TraesCS5A03G0905200;TraesCS5B03G0688600;TraesCS5B03G1266000;TraesCS6B03G0225100LC;TraesCS6B03G0225700;TraesCS6D03G0383000;TraesCS7A03G0367300;TraesCS7A03G0626400;TraesCS7A03G0628000;TraesCS7A03G0812700;TraesCS7A…	K00002+K01728+K01051+K12447+K01051+K01051+K01184+K01728+K00963+K01051+K01184+K01728+K16190+K16190+K01728+K01051+K00008+K01213+K01213+K01051+K01051+K01213+K01051+K01051+K00002+K00008+K01051+K01213
	RNA polymerase	ko03020	11	TraesCS2B03G0864000LC;TraesCS3A03G0249700;TraesCS3A03G0319900LC;TraesCS3A03G0943200;TraesCS3B03G1075800;TraesCS4B03G0158200;TraesCS4B03G0158700;TraesCS6A03G0139400;TraesCS6D03G0131900;TraesCS6D03G0642600;TraesCS7B03G0517500LC	K03046+K03004+K03006+K03026+K03026+K03026+K03026+K03012+K03012+K03012+K03006
	Butanoate metabolism	ko00650	9	TraesCS3A03G0786300;TraesCS3A03G0800800;TraesCS3A03G0800900;TraesCS3B03G0535500;TraesCS3B03G0924300;TraesCS4B03G0632100;TraesCS4D03G0096100;TraesCS6B03G0729400;TraesCS6D03G0324300	K00074+K00109+K00109+K01640+K00109+K01580+K01580+K01653+K17761
	DNA replication	ko03030	15	TraesCS1A03G0206300;TraesCS1A03G0840800;TraesCS1B03G0966700;TraesCS1D03G0199500;TraesCS1D03G0809400;TraesCS3A03G0336800;TraesCS3B03G0162900LC;TraesCS3B03G0495200;TraesCS3D03G0388500;TraesCS4A03G0003500LC;TraesCS4A03G0602300;TraesCS4B03G0204500;TraesCS4D03G0167600;TraesCS4D03G0355800LC;TraesCS7D03G0633300LC	K07466+K03505+K03505+K07466+K03505+K07466+K07466+K10740+K10740+K07466+K10756+K10756+K10756+K02540+K07466
	Glycolysis / Gluconeogenesis	ko00010	24	TraesCS1A03G0712400;TraesCS1A03G0778700;TraesCS1A03G1002600;TraesCS1B03G0974500;TraesCS1B03G1183200;TraesCS1D03G0815700;TraesCS2A03G0013700;TraesCS3B03G1018200;TraesCS3B03G1403100LC;TraesCS4A03G0540100;TraesCS4A03G0540300;TraesCS4B03G0798400;TraesCS4D03G0203800;TraesCS5B03G1060800;TraesCS5B03G1183600;TraesCS5D03G0254600LC;TraesCS6B03G0458800;TraesCS7B03G0232400;TraesCS7B03G0271100;TraesCS7B03G119…	K00002+K00927+K01792+K00850+K01792+K00850+K00844+K03841+K00627+K18857+K18857+K00121+K18857+K00850+K03103+K00873+K01792+K01834+K00161+K01803+K01803+K00161+K00002+K01803
	Folate biosynthesis	ko00790	8	TraesCS1A03G0468100;TraesCS1A03G0836000;TraesCS1B03G0562200;TraesCS1B03G0959800;TraesCS1D03G0804900;TraesCS5A03G0505400;TraesCS5B03G0508500;TraesCS5D03G0471900	K01930+K01307+K01930+K01307+K01307+K03635+K03635+K03635
	Phagosome	ko04145	11	TraesCS1A03G0383500;TraesCS1D03G0600900;TraesCS3B03G0415400;TraesCS3D03G0330000;TraesCS4A03G0496800;TraesCS4B03G0317000;TraesCS4D03G0259900;TraesCS5A03G0424900;TraesCS5B03G0419800;TraesCS5D03G0393200;TraesCS7A03G0989900	K07375+K10956+K02150+K02150+K09481+K09481+K09481+K09481+K09481+K09481+K02150
	Basal transcription factors	ko03022	15	TraesCS1A03G0209900;TraesCS1A03G0374000;TraesCS1A03G0678900;TraesCS1D03G0203400;TraesCS1D03G0782400;TraesCS2D03G0451000;TraesCS3A03G0678000;TraesCS3B03G0819500LC;TraesCS3D03G0618800;TraesCS4A03G0752500;TraesCS4D03G0022700;TraesCS4D03G0540300;TraesCS5A03G0785100;TraesCS7A03G0312600;TraesCS7D03G0294900	K06634+K03120+K03122+K06634+K03139+K03122+K03135+K14651+K03135+K03120+K03120+K03138+K03124+K10842+K10842
	Terpenoid backbone biosynthesis	ko00900	12	TraesCS1D03G0385500LC;TraesCS2A03G0390600;TraesCS2B03G0064400LC;TraesCS2B03G0064700LC;TraesCS2B03G0530500;TraesCS2D03G0417900;TraesCS5D03G0693400LC;TraesCS6A03G0696200;TraesCS6D03G0584400;TraesCS7A03G0364300;TraesCS7B03G0386400;TraesCS7D03G0553900	K05906+K13789+K12742+K12742+K13789+K13789+K05955+K01770+K01770+K01597+K00021+K00021
	Porphyrin and chlorophyll metabolism	ko00860	15	TraesCS1B03G0190500;TraesCS1D03G0127000;TraesCS3A03G0589100;TraesCS4A03G1042000;TraesCS5A03G1076000;TraesCS5B03G0127200;TraesCS6A03G0341300;TraesCS6A03G1011400;TraesCS6B03G0438600;TraesCS6B03G0650500;TraesCS6D03G0207700;TraesCS7A03G0154300;TraesCS7B03G1110100LC;TraesCS7D03G0141900;TraesCS7D03G0590800	K02492+K02492+K02303+K03428+K13071+K00231+K01749+K19073+K01749+K13606+K01698+K03428+K13545+K03428+K01845
	Valine, leucine and isoleucine degradation	ko00280	15	TraesCS1B03G1160900;TraesCS3B03G0535500;TraesCS3B03G0796400;TraesCS3D03G0640000;TraesCS3D03G0668700;TraesCS4B03G0469500;TraesCS4B03G0643100;TraesCS4B03G0938300;TraesCS5A03G1239900;TraesCS5B03G0133000;TraesCS5B03G1109300;TraesCS6A03G0376400;TraesCS6A03G0823800;TraesCS6B03G0465700;TraesCS6D03G0323900	K00020+K01640+K00020+K00020+K05605+K00827+K00826+K00826+K00826+K00020+K00826+K01968+K00020+K01968+K01968
	Linoleic acid metabolism	ko00591	5	TraesCS1D03G0539400;TraesCS2A03G1107600;TraesCS2A03G1219200;TraesCS2B03G0867600;TraesCS4B03G0094500	K00454+K01047+K15718+K00454+K01047
	Sulfur metabolism	ko00920	4	TraesCS4A03G0088700;TraesCS4A03G0747300;TraesCS4B03G0692700;TraesCS4D03G0620200	K00860+K00641+K00860+K00860
	ABC transporters	ko02010	21	TraesCS1A03G0119600;TraesCS1A03G0822900;TraesCS1B03G0164400;TraesCS2B03G1534200;TraesCS2D03G1299900;TraesCS4A03G0575400;TraesCS4B03G0218300;TraesCS4D03G0180200;TraesCS5D03G0452900;TraesCS5D03G0896500;TraesCS6A03G0708800;TraesCS6B03G0841500;TraesCS6D03G0595700;TraesCS7A03G0428100;TraesCS7A03G0624800;TraesCS7A03G0793400;TraesCS7D03G0255700;TraesCS7D03G0416300;TraesCS7D03G0840200;TraesCSU03G0092600L…	K05681+K05658+K05681+K05681+K05681+K05681+K05681+K05681+K08712+K05656+K05658+K05658+K05658+K08712+K08712+K05665+K05666+K08712+K05643+K05666+K05666
	Sesquiterpenoid and triterpenoid biosynthesis	ko00909	7	TraesCS2B03G0019900;TraesCS2D03G0016100;TraesCS2D03G0016300;TraesCS5A03G0912900;TraesCS5D03G0874100;TraesCS7B03G0356700;TraesCS7B03G1082100LC	K15803+K15803+K15803+K15472+K15472+K19011+K15803
	Pantothenate and CoA biosynthesis	ko00770	8	TraesCS2B03G1445600;TraesCS2D03G1218200;TraesCS4B03G0643100;TraesCS4B03G0938300;TraesCS5A03G1239900;TraesCS5B03G1109300;TraesCS6B03G0729400;TraesCS7D03G0226400LC	K17839+K17839+K00826+K00826+K00826+K00826+K01653+K00053
	Ubiquinone and other terpenoid-quinone biosynthesis	ko00130	17	TraesCS1A03G0220500;TraesCS1B03G0075300;TraesCS1B03G0267900;TraesCS1D03G0059800;TraesCS1D03G0759800;TraesCS1D03G0793600LC;TraesCS2B03G0328800;TraesCS3D03G1179900;TraesCS4B03G0798600;TraesCS6A03G0649400;TraesCS6B03G0855000;TraesCS6D03G0605000;TraesCS7A03G0407200;TraesCS7A03G0762800;TraesCS7B03G0593600;TraesCS7D03G0391800;TraesCS7D03G0392300	K03809+K19222+K19222+K19222+K03809+K19222+K00815+K19222+K23094+K12502+K05928+K05928+K17872+K14760+K14760+K17872+K17872
	RNA transport	ko03013	46	TraesCS1A03G0200700;TraesCS1A03G0716300;TraesCS1B03G0269500;TraesCS1B03G0603600LC;TraesCS1B03G0816700;TraesCS1D03G0192200;TraesCS1D03G0679000;TraesCS2A03G0381200;TraesCS2A03G0655400LC;TraesCS2B03G0474400;TraesCS2B03G0507600;TraesCS2D03G0398700;TraesCS2D03G0894100;TraesCS3B03G0425600;TraesCS3D03G0340500;TraesCS3D03G0662800;TraesCS3D03G0720800;TraesCS3D03G0939500LC;TraesCS4A03G0007900LC;TraesCS4A03…	K03260+K14292+K03260+K14300+K14292+K03260+K14292+K14319+K13171+K03248+K14319+K14319+K10577+K03231+K03231+K14292+K14293+K14289+K14300+K05019+K03260+K12881+K14300+K13025+K14317+K14317+K12881+K13126+K03260+K14317+K13126+K03260+K12881+K13126+K03260+K03260+K03257+K03253+K03257+K03257+K14313+K14293+K03243+K18213+K03538+K03254
	Stilbenoid, diarylheptanoid and gingerol biosynthesis	ko00945	5	TraesCS3D03G0082400;TraesCS5A03G0920200;TraesCS5B03G0971900;TraesCS6A03G0034100;TraesCS7D03G0105600	K16040+K13065+K13065+K16040+K17212
	Plant hormone signal transduction	ko04075	123	TraesCS1A03G0201700;TraesCS1A03G0248200;TraesCS1A03G0402900;TraesCS1A03G0846400;TraesCS1A03G0875600;TraesCS1B03G0270100;TraesCS1B03G0751300;TraesCS1B03G0779800;TraesCS1D03G0192500;TraesCS1D03G0405800;TraesCS1D03G0666700;TraesCS1D03G0851600;TraesCS2A03G0179800;TraesCS2A03G0205300;TraesCS2A03G0614300;TraesCS2A03G0771400;TraesCS2A03G0810000;TraesCS2A03G1348400;TraesCS2B03G0281300;TraesCS2B03G0508700…	K12126+K13422+K13415+K14484+K14497+K12126+K14491+K14498+K12126+K13416+K13946+K14497+K14496+K14514+K13413+K14492+K13415+K14498+K14514+K14487+K14491+K14492+K13415+K14486+K14432+K14488+K14497+K13415+K14487+K14487+K13416+K14498+K14498+K13422+K13415+K14509+K14497+K14497+K14491+K14491+K14497+K14497+K13416+K14494+K13416+K13422+K13415+K14431+K14497+K14497+K14497+K14431+K14491+K14492+K14495+K14497+K14432+…
	Monobactam biosynthesis	ko00261	1	TraesCS5B03G1312700	K00928
	Fatty acid biosynthesis	ko00061	10	TraesCS1D03G0178000;TraesCS1D03G0896600;TraesCS2A03G0926800;TraesCS2B03G1018900;TraesCS2D03G0866400;TraesCS5A03G0599200;TraesCS5B03G0976900;TraesCS5D03G0886000;TraesCS6B03G0061000LC;TraesCS7A03G0567900	K01897+K00059+K02372+K02372+K02372+K03921+K00059+K00059+K11262+K00059
	Glycerophospholipid metabolism	ko00564	26	TraesCS1A03G0610900;TraesCS1A03G0676700;TraesCS1A03G0905600;TraesCS1A03G0920800;TraesCS1B03G0362100;TraesCS1B03G0702400;TraesCS1B03G0888700LC;TraesCS1D03G0244200;TraesCS1D03G0578600;TraesCS1D03G0874600;TraesCS2A03G0242300;TraesCS2A03G1107600;TraesCS2D03G0246600;TraesCS2D03G1331600;TraesCS3A03G0628600;TraesCS3A03G0644100;TraesCS3B03G0932700;TraesCS3D03G0581200;TraesCS3D03G0589100;TraesCS3D03G07466…	K00901+K16818+K18693+K08730+K01126+K00901+K00006+K16818+K00901+K05929+K16818+K01047+K16818+K01115+K14156+K16818+K18696+K14156+K16818+K18696+K01047+K22389+K22389+K01115+K01126+K01126
	Fatty acid elongation	ko00062	9	TraesCS4B03G0661100LC;TraesCS4D03G0523700;TraesCS5A03G0753100;TraesCS5B03G0978900;TraesCS5D03G0887200;TraesCS6B03G1287600;TraesCS6D03G0148200;TraesCS7B03G0296900;TraesCS7D03G0750400LC	K15397+K10251+K15397+K15397+K15397+K15397+K15397+K15397+K15397
	Benzoxazinoid biosynthesis	ko00402	6	TraesCS2B03G0041700;TraesCS2B03G0042300;TraesCS2B03G0142700;TraesCS5A03G1039500;TraesCS7D03G0261400;TraesCSU03G0167000	K13223+K13223+K13229+K13222+K13227+K13229
	Other glycan degradation	ko00511	17	TraesCS1A03G0256500;TraesCS1D03G0257100;TraesCS2A03G0391700;TraesCS2D03G0416500;TraesCS2D03G0909100;TraesCS2D03G0916600;TraesCS3A03G0533500;TraesCS3A03G0606000;TraesCS3A03G0785800LC;TraesCS3B03G0286700;TraesCS3B03G0615500;TraesCS3B03G0619400LC;TraesCS3D03G0221000;TraesCS3D03G0496500;TraesCS4B03G0630500;TraesCS7A03G0853700;TraesCS7D03G0753800	K01206+K01206+K12309+K12309+K12309+K01206+K12309+K01206+K17108+K12309+K12309+K12309+K12309+K12309+K12309+K01206+K17108
	Photosynthesis	ko00195	34	TraesCS1A03G0955000;TraesCS1D03G0931200;TraesCS2A03G0235700;TraesCS2A03G0460300;TraesCS2A03G0608700;TraesCS2A03G0735500LC;TraesCS2B03G0324800;TraesCS2B03G0698600;TraesCS2B03G0811700;TraesCS2D03G0240900;TraesCS2D03G0467500;TraesCS2D03G0677900;TraesCS3B03G0876000;TraesCS3D03G0704100;TraesCS3D03G0784700;TraesCS4A03G0288200;TraesCS4A03G0652000;TraesCS4B03G0032700;TraesCS4B03G0147600;TraesCS4D03G01249…	K02695+K02695+K02701+K08901+K02641+K02639+K02701+K02698+K02639+K02701+K08901+K02639+K02721+K02721+K08903+K08902+K02113+K02639+K02113+K02113+K08902+K02692+K08905+K02692+K08905+K02692+K08901+K02723+K02639+K02639+K02723+K02639+K02723+K02639
	Arachidonic acid metabolism	ko00590	8	TraesCS2A03G1107600;TraesCS2B03G1397000;TraesCS3B03G0497800;TraesCS4B03G0094500;TraesCS7A03G0352200;TraesCS7A03G0517300;TraesCS7B03G0147000;TraesCS7D03G0341000	K01047+K08726+K08726+K01047+K00432+K08726+K00432+K00432
	Starch and sucrose metabolism	ko00500	63	TraesCS1A03G0121000;TraesCS1A03G0222100;TraesCS1A03G0704200;TraesCS1A03G0837600;TraesCS1B03G0185400;TraesCS1B03G0803600;TraesCS1D03G0124200;TraesCS1D03G0535100;TraesCS1D03G0668900;TraesCS1D03G0805800;TraesCS2A03G0013700;TraesCS2A03G0369700;TraesCS2B03G0994500;TraesCS2B03G1488800;TraesCS2D03G0775400;TraesCS2D03G0775900;TraesCS2D03G0843400;TraesCS3A03G0637300;TraesCS3A03G0938200;TraesCS3A03G1065800…	K19891+K00703+K05349+K16055+K19891+K05349+K19891+K01087+K05349+K16055+K00844+K19892+K01176+K01193+K01179+K01179+K01176+K01176+K00847+K01188+K19892+K19891+K00847+K19893+K00695+K00963+K19892+K01177+K00696+K00695+K19892+K01177+K01176+K16055+K01188+K19891+K19891+K00688+K01177+K16055+K19891+K19891+K00975+K16055+K01188+K19891+K19891+K16055+K19892+K16055+K19891+K16055+K01188+K01179+K01188+K00703+K01179+…
	Lysine biosynthesis	ko00300	2	TraesCS3B03G0956400LC;TraesCS5B03G1312700	K10206+K00928
	beta-Alanine metabolism	ko00410	11	TraesCS2A03G0826800;TraesCS2B03G0210000;TraesCS2B03G0913900;TraesCS2B03G1445600;TraesCS2D03G0146700;TraesCS2D03G1218200;TraesCS3D03G0668700;TraesCS4B03G0619700;TraesCS4B03G0632100;TraesCS4D03G0096100;TraesCS7D03G0321800	K00276+K00276+K00276+K17839+K00276+K17839+K05605+K00276+K01580+K01580+K00232
	alpha-Linolenic acid metabolism	ko00592	17	TraesCS1A03G0676700;TraesCS1D03G0244200;TraesCS1D03G0539400;TraesCS2A03G0242300;TraesCS2A03G1107600;TraesCS2B03G0867600;TraesCS2D03G0246600;TraesCS3A03G0644100;TraesCS3D03G0589100;TraesCS4A03G0540100;TraesCS4A03G0540300;TraesCS4B03G0094500;TraesCS4D03G0203800;TraesCS4D03G0390100LC;TraesCS5D03G0657100;TraesCS5D03G0689900;TraesCS7D03G0321800	K16818+K16818+K00454+K16818+K01047+K00454+K16818+K16818+K16818+K18857+K18857+K01047+K18857+K22389+K00224+K22389+K00232
	Cutin, suberine and wax biosynthesis	ko00073	13	TraesCS2A03G0730400;TraesCS2B03G0806500;TraesCS2D03G0673600;TraesCS3B03G0227800;TraesCS4B03G0194300LC;TraesCS5A03G1198400;TraesCS5A03G1240000;TraesCS5D03G0482300LC;TraesCS6B03G0926000;TraesCS6D03G0660400;TraesCS6D03G0851800;TraesCS7A03G0022600LC;TraesCS7A03G1217600	K21995+K21995+K21995+K20495+K15398+K15402+K13356+K13356+K17991+K17991+K15404+K13356+K15404
